# Supplementary material
Source: publisher figshare collection journal article supplement (https://acs.figshare.com/ndownloader/files/3994009)

**Supporting Information**

**for**

**Enhanced catalytic activity of [CpNi(NHC)Cl] complexes**

**in arylamination**

Anthony R. Martin, Sébastien Meiries, Alexandra M. Z. Slawin and Steven P. Nolan\*

Address: EastCHEM School of Chemistry, University of St Andrews, North Haugh, St Andrews, KY16 9ST, UK

Email: Steven P. Nolan\* - [snolan@st-andrews.ac.uk](mailto:snolan@st-andrews.ac.uk)

\* Corresponding author

**Table of contents**

|                                                                                        |         |
|----------------------------------------------------------------------------------------|---------|
| <b>General considerations:</b>                                                         | S 2     |
| <b>Overlay of complexes 1-5:</b>                                                       | S 3     |
| <b>General procedure for the synthesis of complexes 1-4 and characterization data:</b> | S 3-5   |
| <b>Optimization reactions:</b>                                                         | S 6     |
| <b>General procedure for the arylamination reaction:</b>                               | S 6     |
| <b>Characterization data for the coupling products:</b>                                | S 7-10  |
| <b><sup>1</sup>H and <sup>13</sup>C NMR spectra of all compounds:</b>                  | S 11-26 |

## General considerations:

All aryl halides and amines were used as received. Anhydrous solvents (1,4-dioxane, tetrahydrofuran (THF), dimethoxyethane (DME), and toluene) and the bases ( $\text{NaO}^t\text{Bu}$ ,  $\text{KO}^t\text{Bu}$ ) were stored in a glovebox and used as received.  $\text{KO}^t\text{Am}$ , received as a 1.7 M solution in toluene, was dried on a schlenk line, stored in a glovebox and used as a white powder. Nickelocene was purchased from STREM chemicals and used as received.

Flash chromatography was performed on silica gel 60 Å pore diameter and 40-63 µm particle size.

$^1\text{H}$  and  $^{13}\text{C}$  Nuclear Magnetic Resonance (NMR) spectra were recorded on a Bruker- 300 MHz or 400 MHz spectrometer at ambient temperature in  $\text{CD}_2\text{Cl}_2$  or  $\text{CDCl}_3$ . Chemical shifts ( $\delta$ ) are reported in ppm, relative to the solvent residual peak  $\text{CD}_2\text{Cl}_2$  (5.32 ppm for  $^1\text{H}$  and 54.00 ppm for  $^{13}\text{C}$ ) and  $\text{CDCl}_3$  (7.26 ppm for  $^1\text{H}$  and 77.16 ppm for  $^{13}\text{C}$ ). Data for  $^1\text{H}$  NMR are reported as follows: chemical shift, multiplicity (s = singlet, d = doublet, t = triplet, br = broad signal, m = multiplet), coupling constants ( $J$ ) in Hz and integration.

Elemental analyses were performed at London Metropolitan University 166-220 Holloway Road, London, N7 8DB.

Gas chromatography analyses (GC) were performed on an Agilent 7890A apparatus equipped with a flame ionization detector and a (5%-Phenyl)-methylpolysiloxane column (30 m, 320 µm, film: 0.25 µm). Flow rate 1 mL/min constant flow, inlet temperature 260°C, column temperature 50°C, 20°C/min increase to 300°C (held for 1 min), total time 7.6 min.

### Structure Overlay of complexes 1-5:

The overlays of the core molecular structure of **1-5** obtained by X-Ray analysis are shown in Figure S1. The spatial positions of the C1 (carbene carbon), the nickel center and the Cp ligand do not appear significantly different regardless of the nature of the NHC ligand.

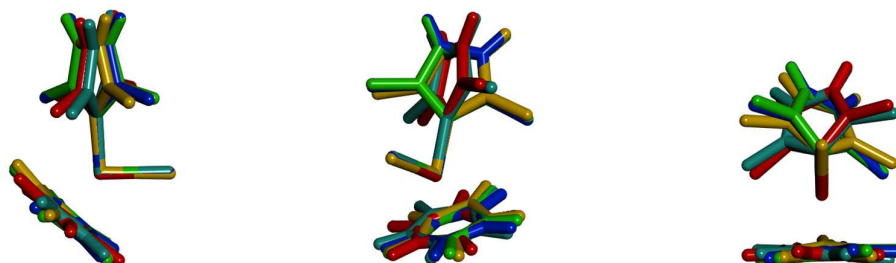

**Figure S1.** Three views of the overlay of **1-5**. Red (**1**), Green (**2**), Blue (**3**), Teal (**4**), Yellow (**5**). *N*-aryl substituents have been omitted for clarity.

### General procedure for the preparation of the complexes 1-4.

In a glovebox, a 50 mL Schlenk flask equipped with a magnetic stirring bar was charged with nickelocene (200 mg, 1.06 mmol) NHC•HCl (1.0 eq., 1.06 mmol) and 20 mL of THF. Outside of the glovebox, the reaction mixture was connected to a Schlenk line and stirred at 70°C for 3-16h. The solvent was eventually evaporated off and the crude residue was dissolved into CH<sub>2</sub>Cl<sub>2</sub> (15 mL) before being passed through a bed of Celite<sup>®</sup> over silica (4 cm of each). The collected filtrate was concentrated until 3 mL of solution remains (excepted for IPent which was concentrated to dryness and did not need further purification). Addition of pentane resulted in the precipitation of the complexes. The supernatant was removed and the residue was washed twice with 25 mL of pentane. The complexes were finally dried overnight under high vacuum at 80°C.

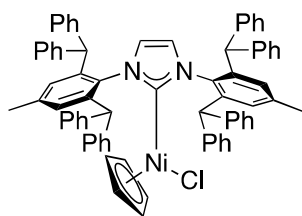

**[Ni(IPr\*)CpCl] (1).** Following the general procedure, using 200 mg of nickelocene and 1.006 g of IPr\*•HCl, **1** was isolated as a purple-pink powder (896 mg) in a 79% yield. Suitable crystals for X-Ray diffraction analysis were grown by slow diffusion of

pentane into a saturated solution of **1** in chloroform. <sup>1</sup>H NMR (CD<sub>2</sub>Cl<sub>2</sub>, 300 MHz) δ 2.34 (s,

6H,  $\text{CH}_3$ ) 4.59 (s, 5H,  $\text{CH}_{\text{Cp}}$ ), 5.02 (s, 2H,  $\text{CH}_{\text{imid.}}$ ), 5.77 (s, 4H,  $\text{CH}(\text{Ph})_2$ ), 6.70-6.74 (m, 8H,  $\text{H}_{\text{Ar}}$ ), 7.03 (s, 4H,  $\text{H}_{\text{Ar}}$ ), 7.07-7.10 (m, 12H,  $\text{H}_{\text{Ar}}$ ), 7.22-7.33 (m, 20H,  $\text{H}_{\text{Ar}}$ ).  $^{13}\text{C}\{^1\text{H}\}$  NMR ( $\text{CD}_2\text{Cl}_2$ , 75 MHz)  $\delta$  22.1 ( $\text{CH}_3$ ), 51.7 ( $\text{CH}$ ), 93.5 ( $\text{CH}_{\text{Cp}}$ ), 125.6 ( $\text{CH}_{\text{Ar}}$ ), 126.8 ( $\text{CH}_{\text{Ar}}$ ), 127.0 ( $\text{CH}_{\text{Ar}}$ ), 128.6 ( $\text{CH}_{\text{Ar}}$ ), 128.7 ( $\text{CH}_{\text{Ar}}$ ), 129.8 ( $\text{CH}_{\text{Ar}}$ ), 130.8 ( $\text{CH}_{\text{Ar}}$ ), 130.9 ( $\text{CH}_{\text{Ar}}$ ), 137.0 ( $\text{C}_{\text{Ar}}$ ), 139.3 ( $\text{C}_{\text{Ar}}$ ), 142.6 ( $\text{C}_{\text{Ar}}$ ), 143.9 ( $\text{C}_{\text{Ar}}$ ), 145.1 ( $\text{C}_{\text{Ar}}$ ), 167.9 ( $\text{C}_{\text{Ar}}$ ). Anal. Calcd for  $\text{C}_{74}\text{H}_{61}\text{N}_2\text{ClNi}$ : C, 82.88; H, 5.73; N, 2.61; found C, 82.91; H, 5.81; N, 2.74.

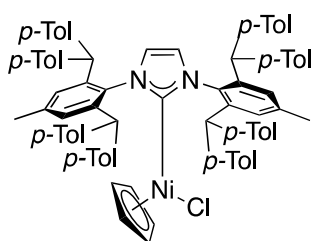

**[Ni(IPr\*<sup>Tol</sup>)CpCl] (2).** Following the general procedure, using 200 mg of nickelocene and 1.124 g of  $\text{IPr}^{*\text{Tol}}\cdot\text{HCl}$ , **2** was isolated as a purple-pink powder (839 mg) in a 67% yield. Suitable crystals for X-Ray diffraction analysis were grown by slow

diffusion of pentane into a saturated solution of **2** in toluene.  $^1\text{H}$  NMR ( $\text{CD}_2\text{Cl}_2$ , 300 MHz)  $\delta$  2.23 (s, 12H,  $\text{CH}_3$ ) 2.32-2.34 (m, 18H,  $\text{CH}_3$ ) 4.59 (s, 5H,  $\text{CH}_{\text{Cp}}$ ), 5.12 (s, 2H,  $\text{CH}_{\text{imid.}}$ ), 5.72 (s, 4H,  $\text{CH}(\text{Ph})_2$ ), 6.58 (d,  $J$  8.1 Hz, 8H,  $\text{H}_{\text{Ar}}$ ), 6.87 (d,  $J$  7.9 Hz, 8H,  $\text{H}_{\text{Ar}}$ ), 7.02 (s, 4H,  $\text{H}_{\text{Ar}}$ ), 7.07 (d,  $J$  8.0 Hz, 8H,  $\text{H}_{\text{Ar}}$ ), 7.19 (d,  $J$  8.1 Hz, 8H,  $\text{H}_{\text{Ar}}$ ).  $^{13}\text{C}\{^1\text{H}\}$  NMR ( $\text{CD}_2\text{Cl}_2$ , 75 MHz)  $\delta$  21.2 ( $\text{CH}_3$ ), 21.3 ( $\text{CH}_3$ ), 22.1 ( $\text{CH}_3$ ), 51.0 ( $\text{CH}$ ), 93.6 ( $\text{CH}_{\text{Cp}}$ ), 125.6 ( $\text{CH}_{\text{Ar}}$ ), 129.2 ( $\text{CH}_{\text{Ar}}$ ), 129.3 ( $\text{CH}_{\text{Ar}}$ ), 129.6 ( $\text{CH}_{\text{Ar}}$ ), 130.5 ( $\text{CH}_{\text{Ar}}$ ), 130.8 ( $\text{CH}_{\text{Ar}}$ ), 136.3 ( $\text{C}_{\text{Ar}}$ ), 136.5 ( $\text{C}_{\text{Ar}}$ ), 137.0 ( $\text{C}_{\text{Ar}}$ ), 138.9 ( $\text{C}_{\text{Ar}}$ ), 141.3 ( $\text{C}_{\text{Ar}}$ ), 142.3 ( $\text{C}_{\text{Ar}}$ ), 142.6 ( $\text{C}_{\text{Ar}}$ ), 166.9 ( $\text{C}_{\text{Ar}}$ ). Anal. Calcd for  $\text{C}_{82}\text{H}_{77}\text{N}_2\text{ClNi}$ : C, 83.14; H, 6.55; N, 2.36; found C, 83.12; H, 6.53; N, 2.46.

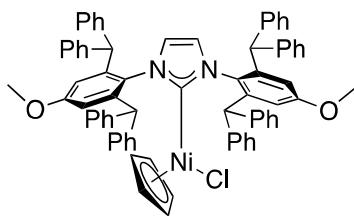

**[Ni(IPr\*<sup>OMe</sup>)CpCl] (3).** Following the general procedure, using 200 mg of nickelocene and 1.039 g of  $\text{IPr}^{*\text{OMe}}\cdot\text{HCl}$ , **3** was isolated as a purple-pink powder (983 mg) in a 84% yield. Suitable crystals for X-Ray diffraction analysis were

grown by slow evaporation of a concentrated solution of **3** in dichloromethane.  $^1\text{H}$  NMR ( $\text{CD}_2\text{Cl}_2$ , 300 MHz)  $\delta$  3.65 (s, 6H,  $\text{OCH}_3$ ) 4.64 (s, 5H,  $\text{CH}_{\text{Cp}}$ ), 4.96 (s, 2H,  $\text{CH}_{\text{imid.}}$ ), 5.77 (s, 4H,  $\text{CH}(\text{Ph})_2$ ), 6.71 (s, 4H,  $\text{H}_{\text{Ar}}$ ), 6.73-6.76 (m, 8H,  $\text{H}_{\text{Ar}}$ ), 7.07-7.10 (m, 12H,  $\text{H}_{\text{Ar}}$ ), 7.22-7.33

(m, 20H,  $H_{Ar}$ ).  $^{13}C\{^1H\}$  NMR ( $CD_2Cl_2$ , 75 MHz)  $\delta$  52.0 (CH), 55.7 (OCH<sub>3</sub>) 93.4 (CH<sub>Cp</sub>), 115.4 (CH<sub>Ar</sub>), 125.7 (CH<sub>Ar</sub>), 126.9 (CH<sub>Ar</sub>), 127.2 (CH<sub>Ar</sub>), 128.7 (CH<sub>Ar</sub>), 129.7 (CH<sub>Ar</sub>), 130.9 (CH<sub>Ar</sub>), 132.5 (C<sub>Ar</sub>), 143.7 (C<sub>Ar</sub>), 144.5 (C<sub>Ar</sub>), 144.9 (C<sub>Ar</sub>), 159.7 (C<sub>Ar</sub>), 168.7. Anal. Calcd for  $C_{74}H_{61}N_2O_2ClNi$ : C, 80.47; H, 5.57; N, 2.54; found C, 80.53; H, 5.65; N, 2.67.

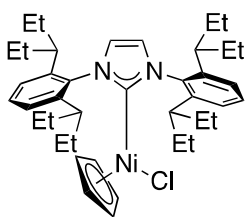

**[Ni(IPent)CpCl] (4).** Following the general procedure, using 200 mg of nickelocene and 531 mg of IPent•HCl, **4** was isolated as a purple-pink powder (468 mg) in a 76% yield. Suitable crystals for X-Ray diffraction analysis were grown by slow evaporation of a saturated

solution of **4** in pentane.  $^1H$  NMR ( $CD_2Cl_2$ , 300 MHz)  $\delta$  0.73 (t,  $J$  7.5 Hz, 12H, CH<sub>3</sub>), 1.02 (t,  $J$  7.3 Hz, 12H, CH<sub>3</sub>), 1.43-1.58 (m, 8H, CH<sub>2</sub>), 1.83-2.04 (m, 8H, CH<sub>2</sub>), 2.46-2.54 (m, 4H, CH), 4.48 (s, 5H, CH<sub>Cp</sub>), 7.09 (s, 2H, CH<sub>imid.</sub>), 7.32 (d,  $J$  7.8 Hz, 4H,  $H_{Ar}$ ), 7.52 (t,  $J$  7.7 Hz, 2H,  $H_{Ar}$ ).  $^{13}C\{^1H\}$  NMR ( $CD_2Cl_2$ , 75 MHz)  $\delta$  10.4 (CH<sub>3</sub>), 12.9 (CH<sub>3</sub>), 26.6 (CH<sub>2</sub>), 27.6 (CH<sub>2</sub>), 41.3 (CH), 92.8 (CH<sub>Cp</sub>), 125.9 (CH<sub>Ar</sub>), 126.4 (CH<sub>Ar</sub>), 129.2 (CH<sub>Ar</sub>), 145.0 (C<sub>Ar</sub>), 167.5 (C<sub>Ar</sub>). Anal. Calcd for  $C_{40}H_{57}N_2ClNi$ : C, 72.79; H, 8.70; N, 4.24; found C, 72.68; H, 8.82; N, 4.33.

## Optimization reactions:

### Optimization of the solvent/ base combination and catalyst loading<sup>a</sup>

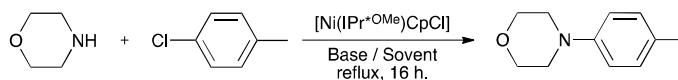

| Solvent               | Base                | Catalyst loading (mol %) | Conversion (%) <sup>b</sup> |
|-----------------------|---------------------|--------------------------|-----------------------------|
| Dioxane               | KO <sup>t</sup> Bu  | 5                        | 89                          |
| Dioxane               | NaO <sup>t</sup> Bu | 5                        | 39                          |
| Dioxane               | KO <sup>t</sup> Am  | 5                        | 97                          |
| Dimethoxyethane (DME) | KO <sup>t</sup> Bu  | 5                        | 26                          |
| Dimethoxyethane (DME) | NaO <sup>t</sup> Bu | 5                        | 2                           |
| Dimethoxyethane (DME) | KO <sup>t</sup> Am  | 5                        | 52                          |
| THF                   | KO <sup>t</sup> Bu  | 5                        | 48                          |
| THF                   | NaO <sup>t</sup> Bu | 5                        | 0                           |
| THF                   | KO <sup>t</sup> Am  | 5                        | 66                          |
| Toluene               | KO <sup>t</sup> Bu  | 5                        | 89                          |
| Toluene               | NaO <sup>t</sup> Bu | 5                        | 58                          |
| Toluene               | KO <sup>t</sup> Am  | 5                        | >99                         |
| Toluene               | KO <sup>t</sup> Am  | 2.5                      | 17                          |
| Toluene               | KO <sup>t</sup> Am  | 1                        | <2                          |

<sup>a</sup> Reaction conditions: 4-chlorotoluene (0.38 mmol), morpholine (0.57 mmol), base (0.76 mmol), solvent (1 mL).

<sup>b</sup> Conversion to *N*-arylated product was determined by GC.

### General procedure for the Buchwald-Hartwig amination reaction.

In a glovebox, a vial containing a stir bar was charged with KO<sup>t</sup>Am (96 mg, 0.76 mmol, 2.0 equiv.), [Ni(IPr\*<sup>OMe</sup>)CpCl] **3** ( $1.90 \times 10^{-5}$  mol, 21 mg, 5 mol%) and sealed with a screw cap fitted with a septum. The amine (0.57 mmol, 1.5 equiv.) and/or the aryl chloride (0.38 mmol, 1.0 equiv.) were added at this point if solids. Outside of the glovebox, the solvent (toluene, 1 mL) was added, followed by the amine and/or the aryl chloride if liquids. Finally, the vial was heated at 110°C for 16 h. The solution was then cooled to room temperature, diluted with 5 mL of dichloromethane and passed through a plug of celite<sup>®</sup> which was subsequently washed twice with 5 mL of dichloromethane. The collected filtrate was concentrated and adsorbed on silica gel prior to purification via flash column chromatography.

### Characterization data of the coupling products.

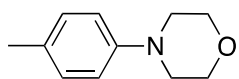

*N*-(*p*-tolyl)morpholine<sup>1</sup> (Table 4, **9a**). The general procedure yielded, after flash chromatography on silica gel (EtOAc, Pentane), 124 mg (92%) of the title compound as a colourless solid. <sup>1</sup>H NMR (CDCl<sub>3</sub>, 300 MHz) δ 2.30 (s, 3H, CH<sub>3</sub>), 3.11-3.14 (m, 4H, N-CH<sub>2</sub>), 3.86-3.90 (m, 4H, O-CH<sub>2</sub>), 6.86 (d, *J* 8.7 Hz, 2H, H<sub>Ar</sub>), 7.12 (d, *J* 8.7 Hz, 2H, H<sub>Ar</sub>). <sup>13</sup>C{<sup>1</sup>H} NMR (CDCl<sub>3</sub>, 75 MHz) δ 20.5 (CH<sub>3</sub>), 50.1 (CH<sub>2</sub>), 67.1 (CH<sub>2</sub>), 116.2 (CH<sub>Ar</sub>), 129.7 (C<sub>Ar</sub>), 129.8 (CH<sub>Ar</sub>), 149.2 (C<sub>Ar</sub>).

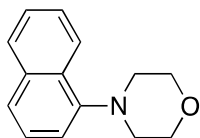

*N*-naphthalenylmorpholine<sup>2</sup> (Table 4, **9b**). The general procedure yielded, after flash chromatography on silica gel (EtOAc, Pentane), 117 mg (72%) of the title compound as a colourless oil. <sup>1</sup>H NMR (CDCl<sub>3</sub>, 300 MHz) δ 3.13-3.16 (m, 4H, N-CH<sub>2</sub>), 4.01-4.04 (m, 4H, O-CH<sub>2</sub>), 7.12 (dd, *J* 7.4 and 1.1 Hz, 1H, H<sub>Ar</sub>), 7.46 (dd, *J* 8.2 and 7.4 Hz, 1H, H<sub>Ar</sub>), 7.49-7.57 (m, 2H, H<sub>Ar</sub>), 7.62 (d, *J* 8.2 Hz, 1H, H<sub>Ar</sub>), 7.87-7.90 (m, 1H, H<sub>Ar</sub>), 8.27-8.30 (m, 1H, H<sub>Ar</sub>). <sup>13</sup>C{<sup>1</sup>H} NMR (CDCl<sub>3</sub>, 75 MHz) δ 53.5 (CH<sub>2</sub>), 67.5 (CH<sub>2</sub>), 114.7 (CH<sub>Ar</sub>), 123.5 (CH<sub>Ar</sub>), 123.8 (CH<sub>Ar</sub>), 125.5 (CH<sub>Ar</sub>), 125.9 (CH<sub>Ar</sub>), 128.5 (CH<sub>Ar</sub>), 128.8 (C<sub>Ar</sub>), 134.8 (C<sub>Ar</sub>), 149.5 (C<sub>Ar</sub>).

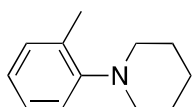

*N*-(*o*-tolyl)piperidine<sup>3</sup> (Table 4, **9c**). The general procedure yielded, after flash chromatography on silica gel (EtOAc, Pentane), 38 mg (29%) of the title compound as a colourless oil. <sup>1</sup>H NMR (CDCl<sub>3</sub>, 300 MHz) δ 1.51-1.69 (m, 2H, CH<sub>2</sub>), 1.69-1.76 (m, 4H, CH<sub>2</sub>), 2.32 (s, 3H, CH<sub>3</sub>), 2.84-2.87 (m, 4H, CH<sub>2</sub>), 6.85 (td, *J* 7.4 and 1.3 Hz, 1H, H<sub>Ar</sub>), 7.02 (d, *J* 8.1 Hz, 1H, H<sub>Ar</sub>), 7.14-7.20 (m, 2H, H<sub>Ar</sub>). <sup>13</sup>C{<sup>1</sup>H} NMR (CDCl<sub>3</sub>, 75 MHz) δ 18.0 (CH<sub>3</sub>), 24.6 (CH<sub>2</sub>), 26.8 (CH<sub>2</sub>), 53.5 (CH<sub>2</sub>), 119.1 (CH<sub>Ar</sub>), 122.7 (CH<sub>Ar</sub>), 126.5 (CH<sub>Ar</sub>), 131.0 (CH<sub>Ar</sub>), 132.8 (C<sub>Ar</sub>), 153.1 (C<sub>Ar</sub>).

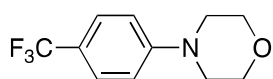

*N*-(4-trifluoromethylphenyl)morpholine<sup>4</sup> (Table 4, **9e**). The general procedure yielded, after flash chromatography on silica gel (EtOAc, Pentane), 163 mg (93%) of the title compound as a pale yellow solid. <sup>1</sup>H NMR (CDCl<sub>3</sub>, 400 MHz) δ 3.23-3.25 (m, 4H, CH<sub>2</sub>), 3.86-3.88 (m, 4H, CH<sub>2</sub>), 6.93 (d, *J* 8.6 Hz, 2H, H<sub>Ar</sub>), 7.50 (d, *J* 8.5 Hz, 2H, H<sub>Ar</sub>). <sup>13</sup>C{<sup>1</sup>H} NMR (CDCl<sub>3</sub>, 75 MHz) δ 48.3 (CH<sub>2</sub>), 66.8 (CH<sub>2</sub>), 114.4 (CH<sub>Ar</sub>), 121.1 (q, *J*<sub>C-F</sub> 32.7 Hz, C<sub>Ar</sub>), 124.8 (q, *J*<sub>C-F</sub> 270.7 Hz, C<sub>Ar</sub>), 126.6 (q, *J*<sub>C-F</sub> 3.6 Hz, CH<sub>Ar</sub>), 153.5 (C<sub>Ar</sub>). <sup>19</sup>F{<sup>1</sup>H} NMR (CDCl<sub>3</sub>, 376 MHz) δ -61.93.

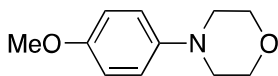

*N*-(4-methoxyphenyl)morpholine<sup>5</sup> (Table 4, **9f**). The general procedure yielded, after flash chromatography on silica gel (EtOAc, Pentane), 129 mg (88%) of the title compound as a colourless solid. <sup>1</sup>H NMR (CDCl<sub>3</sub>, 300 MHz) δ 3.04-3.07 (m, 4H, CH<sub>2</sub>), 3.77 (s, 3H, CH<sub>3</sub>), 3.85-3.88 (m, 4H, CH<sub>2</sub>), 6.84-6.92 (m, 4H, H<sub>Ar</sub>). <sup>13</sup>C{<sup>1</sup>H} NMR (CDCl<sub>3</sub>, 75 MHz) δ 50.9 (CH<sub>2</sub>), 55.7 (CH<sub>3</sub>), 67.1 (CH<sub>2</sub>), 114.6 (CH<sub>Ar</sub>), 117.9 (CH<sub>Ar</sub>), 145.7 (C<sub>Ar</sub>), 154.1 (C<sub>Ar</sub>).

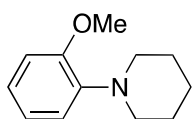

*N*-(2-methoxyphenyl)piperidine<sup>2</sup> (Table 4, **9g**). The general procedure yielded, after flash chromatography on silica gel (EtOAc, Pentane), 97 mg (67%) of the title compound as a colourless oil. <sup>1</sup>H NMR (CDCl<sub>3</sub>, 400 MHz) δ 1.54-1.60 (m, 2H, CH<sub>2</sub>), 1.74-1.79 (m, 4H, CH<sub>2</sub>), 2.97-3.00 (m, 4H, CH<sub>2</sub>), 3.87 (s, 3H, CH<sub>3</sub>), 6.85 (dd, *J* 7.7 and 1.4 Hz, 1H, H<sub>Ar</sub>), 6.89-7.00 (m, 3H, H<sub>Ar</sub>). <sup>13</sup>C{<sup>1</sup>H} NMR (CDCl<sub>3</sub>, 75 MHz) δ 24.6 (CH<sub>2</sub>), 26.5 (CH<sub>2</sub>), 52.4 (CH<sub>2</sub>), 55.4 (CH<sub>3</sub>), 111.2 (CH<sub>Ar</sub>), 118.5 (CH<sub>Ar</sub>), 121.0 (CH<sub>Ar</sub>), 122.6 (CH<sub>Ar</sub>), 142.9 (C<sub>Ar</sub>), 152.5 (C<sub>Ar</sub>).

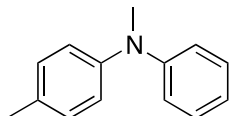

*N*,4-dimethyl-*N*-phenylaniline<sup>1</sup> (Table 4, **9h**). The general procedure yielded, after flash chromatography on silica gel (EtOAc, Pentane), 127



mg (85%) of the title compound as a pale yellow oil.  $^1\text{H}$  NMR ( $\text{CDCl}_3$ , 300 MHz)  $\delta$  2.38 (s, 3H,  $\text{CH}_3$ ), 3.34 (s, 3H,  $\text{CH}_3$ ), 6.92 (tt,  $J$  7.2 and 1.1 Hz, 1H,  $\text{H}_{\text{Ar}}$ ), 6.95-7.00 (m, 2H,  $\text{H}_{\text{Ar}}$ ), 7.03-7.08 (m, 2H,  $\text{H}_{\text{Ar}}$ ), 7.16-7.19 (m, 2H,  $\text{H}_{\text{Ar}}$ ), 7.25-7.32 (m, 2H,  $\text{H}_{\text{Ar}}$ ).  $^{13}\text{C}\{^1\text{H}\}$  NMR ( $\text{CDCl}_3$ , 75 MHz)  $\delta$  20.9 ( $\text{CH}_3$ ), 40.4 ( $\text{CH}_3$ ), 118.3 ( $\text{CH}_{\text{Ar}}$ ), 119.9 ( $\text{CH}_{\text{Ar}}$ ), 122.7 ( $\text{CH}_{\text{Ar}}$ ), 129.1 ( $\text{CH}_{\text{Ar}}$ ), 130.0 ( $\text{CH}_{\text{Ar}}$ ), 131.1 ( $\text{C}_{\text{Ar}}$ ), 146.7 ( $\text{C}_{\text{Ar}}$ ), 149.5 ( $\text{C}_{\text{Ar}}$ ).

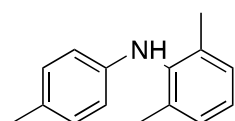

*N*-(*p*-tolyl)-2,6-dimethylaniline<sup>6</sup> (Table 4, **9i**). The general procedure yielded, after flash chromatography on silica gel (EtOAc, Pentane), 117 mg (73%) of the title compound as a pale yellow oil.  $^1\text{H}$  NMR ( $\text{CDCl}_3$ , 300 MHz)  $\delta$  2.24 (s, 6H,  $\text{CH}_3$ ), 2.28 (s, 3H,  $\text{CH}_3$ ), 5.10 (br, 1H,  $\text{NH}$ ), 6.44-6.49 (m, 2H,  $\text{H}_{\text{Ar}}$ ), 7.00 (d,  $J$  8.5 Hz, 2H,  $\text{H}_{\text{Ar}}$ ), 7.07-7.17 (m, 3H,  $\text{H}_{\text{Ar}}$ ).  $^{13}\text{C}\{^1\text{H}\}$  NMR ( $\text{CDCl}_3$ , 75 MHz)  $\delta$  18.5 ( $\text{CH}_3$ ), 20.6 ( $\text{CH}_3$ ), 113.8 ( $\text{CH}_{\text{Ar}}$ ), 125.5 ( $\text{CH}_{\text{Ar}}$ ), 127.5 ( $\text{C}_{\text{Ar}}$ ), 128.6 ( $\text{CH}_{\text{Ar}}$ ), 129.8 ( $\text{CH}_{\text{Ar}}$ ), 135.6 ( $\text{C}_{\text{Ar}}$ ), 138.8 ( $\text{C}_{\text{Ar}}$ ), 144.0 ( $\text{C}_{\text{Ar}}$ ).

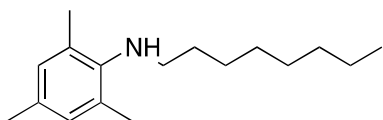

*N*-octyl-2,4,6-trimethylaniline<sup>7</sup> (Table 4, **9j**). The general procedure yielded, after flash chromatography on silica gel (EtOAc, Pentane), 43 mg (23%) of the title compound as a colourless oil.  $^1\text{H}$  NMR ( $\text{CDCl}_3$ , 300 MHz)  $\delta$  0.91 (t,  $J$  7.1 Hz, 3H,  $\text{CH}_3$ ), 1.27-1.42 (m, 10H,  $\text{CH}_2$ ), 1.55-1.64 (m, 2H,  $\text{CH}_2$ ), 2.25 (s, 3H,  $\text{CH}_3$ ), 2.27 (s, 6H,  $\text{CH}_3$ ), 2.85 (br, 1H,  $\text{NH}$ ), 2.91-2.96 (m, 2H,  $\text{CH}_2$ ), 6.83 (s, 2H,  $\text{H}_{\text{Ar}}$ ).  $^{13}\text{C}\{^1\text{H}\}$  NMR ( $\text{CDCl}_3$ , 75 MHz)  $\delta$  14.2 ( $\text{CH}_3$ ), 18.5 ( $\text{CH}_3$ ), 20.7 ( $\text{CH}_3$ ), 22.8 ( $\text{CH}_2$ ), 27.4 ( $\text{CH}_2$ ), 29.4 ( $\text{CH}_2$ ), 29.7 ( $\text{CH}_2$ ), 31.3 ( $\text{CH}_2$ ), 32.0 ( $\text{CH}_2$ ), 49.1 ( $\text{CH}_2$ ), 129.5 ( $\text{CH}_{\text{Ar}}$ ), 129.6 ( $\text{C}_{\text{Ar}}$ ), 131.1 ( $\text{C}_{\text{Ar}}$ ), 144.0 ( $\text{C}_{\text{Ar}}$ ).

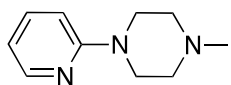

2-(4-methylpiperaz-1-yl)pyridine<sup>8</sup> (Table 4, **9k**). The general procedure yielded, after flash chromatography on silica gel (MeOH, DCM), 78 mg

(58%) of the title compound as a pale yellow oil.  $^1\text{H}$  NMR ( $\text{CDCl}_3$ , 300 MHz)  $\delta$  2.33 (s, 3H,  $\text{CH}_3$ ), 2.49-2.55 (m, 4H,  $\text{CH}_2$ ), 3.53-3.56 (m, 4H,  $\text{CH}_2$ ), 6.58-6.65 (m, 2H,  $\text{H}_{\text{Ar}}$ ), 7.46 (ddd,  $J$  8.7, 7.1 and 2.0 Hz, 1H,  $\text{H}_{\text{Ar}}$ ), 8.18 (ddd,  $J$  4.9, 2.0 and 0.9 Hz, 1H,  $\text{H}_{\text{Ar}}$ ).  $^{13}\text{C}\{^1\text{H}\}$  NMR ( $\text{CDCl}_3$ , 75 MHz)  $\delta$  45.3 ( $\text{CH}_2$ ), 46.4 ( $\text{CH}_3$ ), 55.1 ( $\text{CH}_2$ ), 107.2 ( $\text{CH}_{\text{Ar}}$ ), 113.4 ( $\text{CH}_{\text{Ar}}$ ), 137.5 ( $\text{CH}_{\text{Ar}}$ ), 148.1 ( $\text{CH}_{\text{Ar}}$ ), 159.7 ( $\text{C}_{\text{Ar}}$ ).

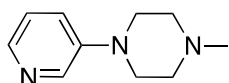

3-(4-methylpiperaz-1-yl)pyridine<sup>5</sup> (Table 4, **9l**). The general procedure yielded, after flash chromatography on silica gel (MeOH, DCM), 108 mg (80%) of the title compound as a pale yellow oil.  $^1\text{H}$  NMR ( $\text{CDCl}_3$ , 300 MHz)  $\delta$  2.33 (s, 3H,  $\text{CH}_3$ ), 2.54-2.57 (m, 4H,  $\text{CH}_2$ ), 3.18-3.23 (m, 4H,  $\text{CH}_2$ ), 7.10-7.18 (m, 2H,  $\text{H}_{\text{Ar}}$ ), 8.08 (dd,  $J$  4.0 and 1.9 Hz, 1H,  $\text{H}_{\text{Ar}}$ ), 8.29 (d,  $J$  1.8 Hz, 1H,  $\text{H}_{\text{Ar}}$ ).  $^{13}\text{C}\{^1\text{H}\}$  NMR ( $\text{CDCl}_3$ , 75 MHz)  $\delta$  46.2 ( $\text{CH}_3$ ), 48.5 ( $\text{CH}_2$ ), 54.9 ( $\text{CH}_2$ ), 122.3 ( $\text{CH}_{\text{Ar}}$ ), 123.5 ( $\text{CH}_{\text{Ar}}$ ), 138.7 ( $\text{CH}_{\text{Ar}}$ ), 140.8 ( $\text{CH}_{\text{Ar}}$ ), 147.0 ( $\text{C}_{\text{Ar}}$ ).

## References:

- (1) Chartoire, A.; Frogneux, X.; Nolan, S. P. *Adv. Synth. Catal.* **2012**, 354, 1897–1901.
- (2) Meiries, S.; Chartoire, A.; Slawin, A. M. Z.; Nolan, S. P. *Organometallics* **2012**, 31, 3402–3409.
- (3) Chartoire, A.; Lesieur, M.; Slawin, A. M. Z.; Nolan, S. P.; Cazin, C. S. J. *Organometallics* **2011**, 30, 4432–4436.
- (4) Tardiff, B. J.; Stradiotto, M. *Eur. J. Org. Chem.* **2012**, 2012, 3972–3977.
- (5) Chartoire, A.; Frogneux, X.; Boreux, A.; Slawin, A. M. Z.; Nolan, S. P. *Organometallics* **2012**, 31, 6947–6951.
- (6) Li, J.; Cui, M.; Yu, A.; Wu, Y. *J. Organomet. Chem.* **2007**, 692, 3732–3742.
- (7) Chen, L.; Yu, G.-A.; Li, F.; Zhu, X.; Zhang, B.; Guo, R.; Li, X.; Yang, Q.; Jin, S.; Liu, C.; Liu, S.-H. *J. Organomet. Chem.* **2010**, 695, 1768–1775.
- (8) Brenner, E.; Schneider, R.; Fort, Y. *Tetrahedron* **1999**, 55, 12829–12842.

# $^1\text{H}$ and $^{13}\text{C}$ NMR spectra of all compounds

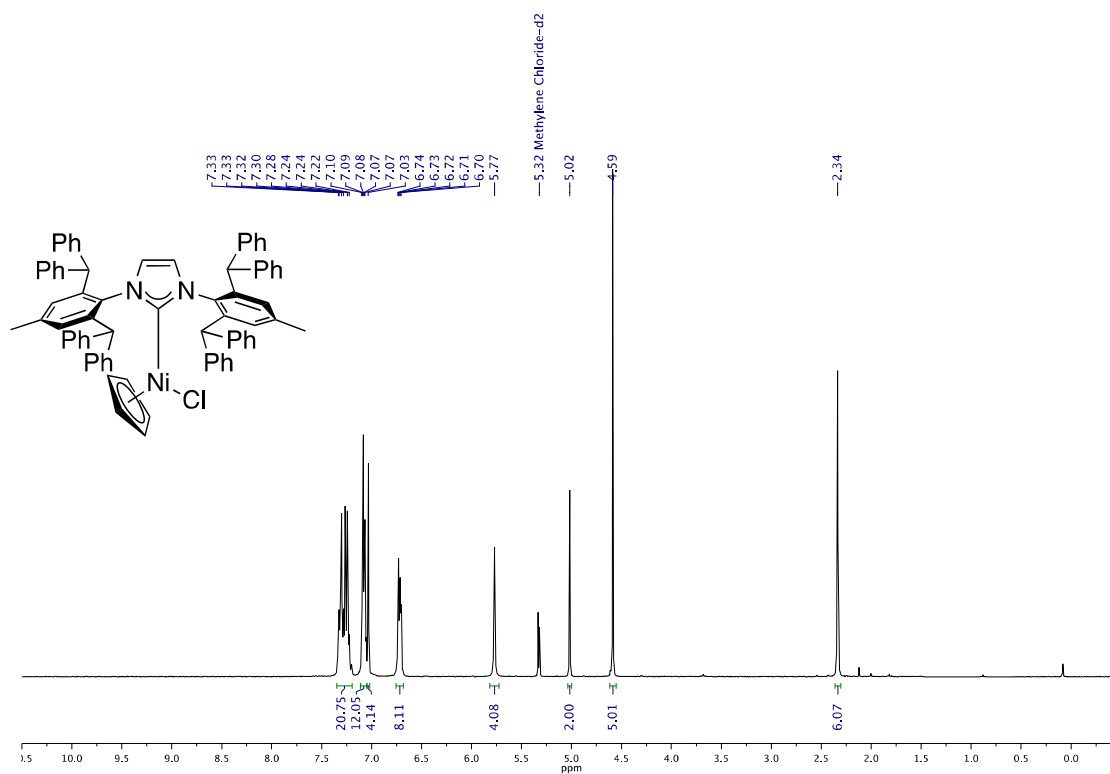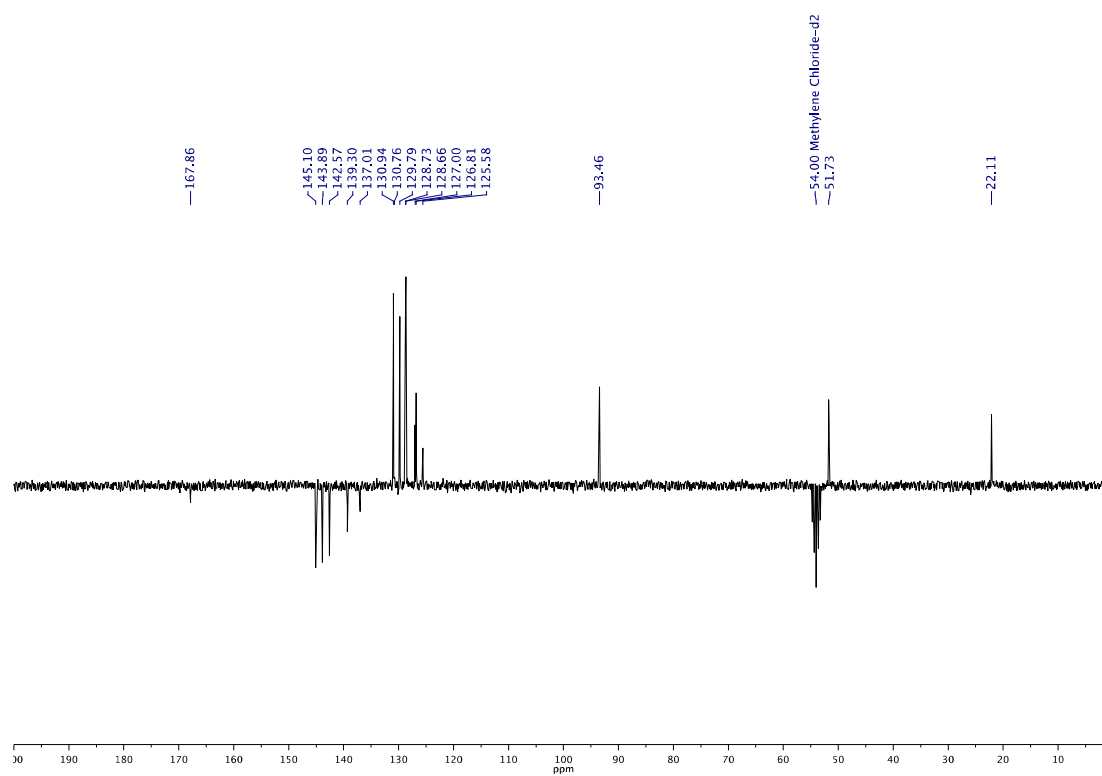

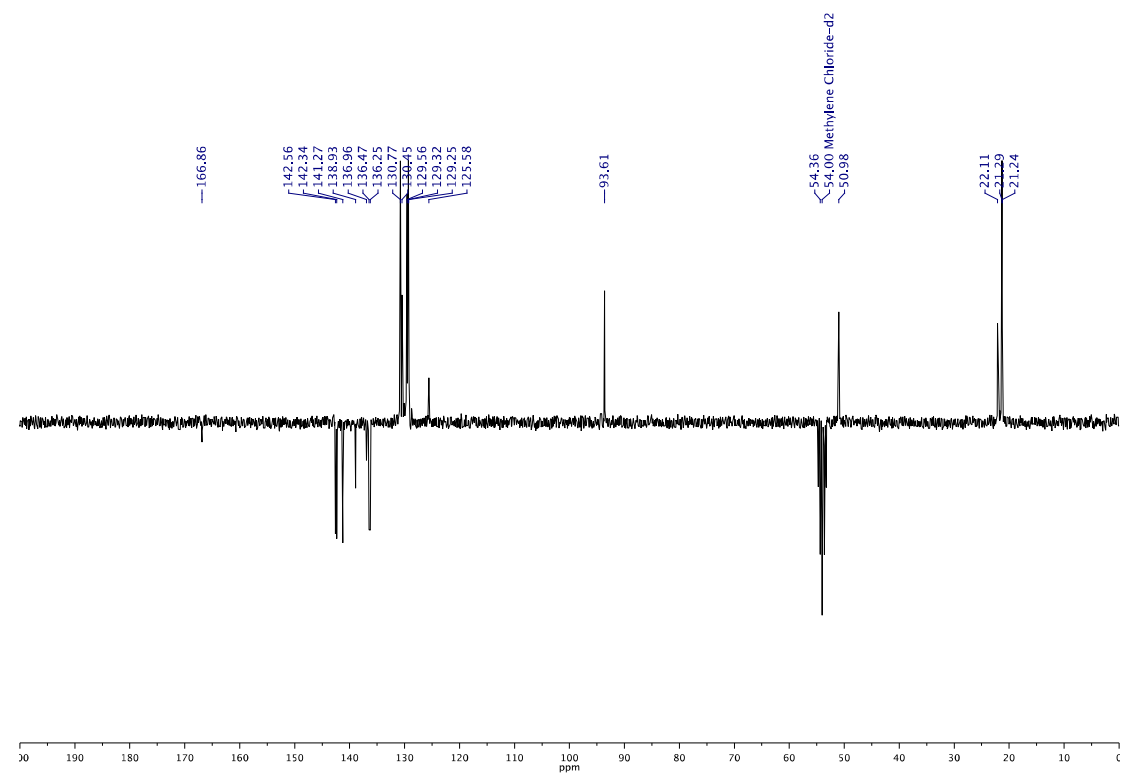

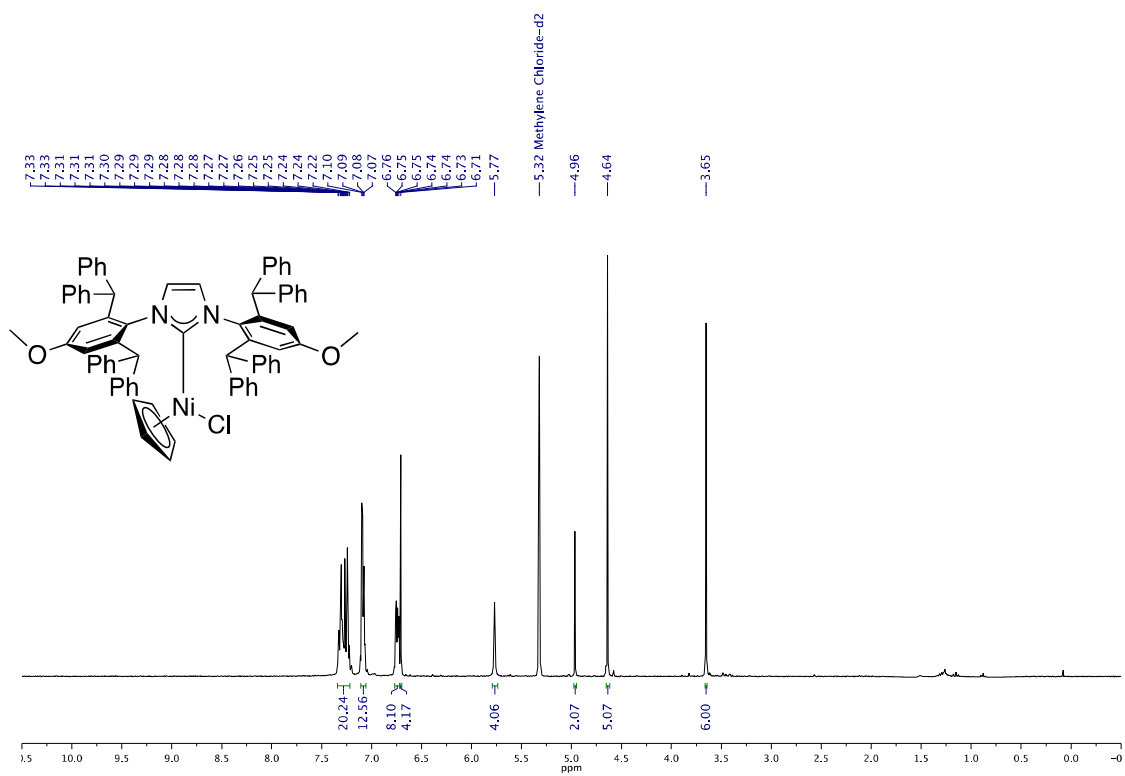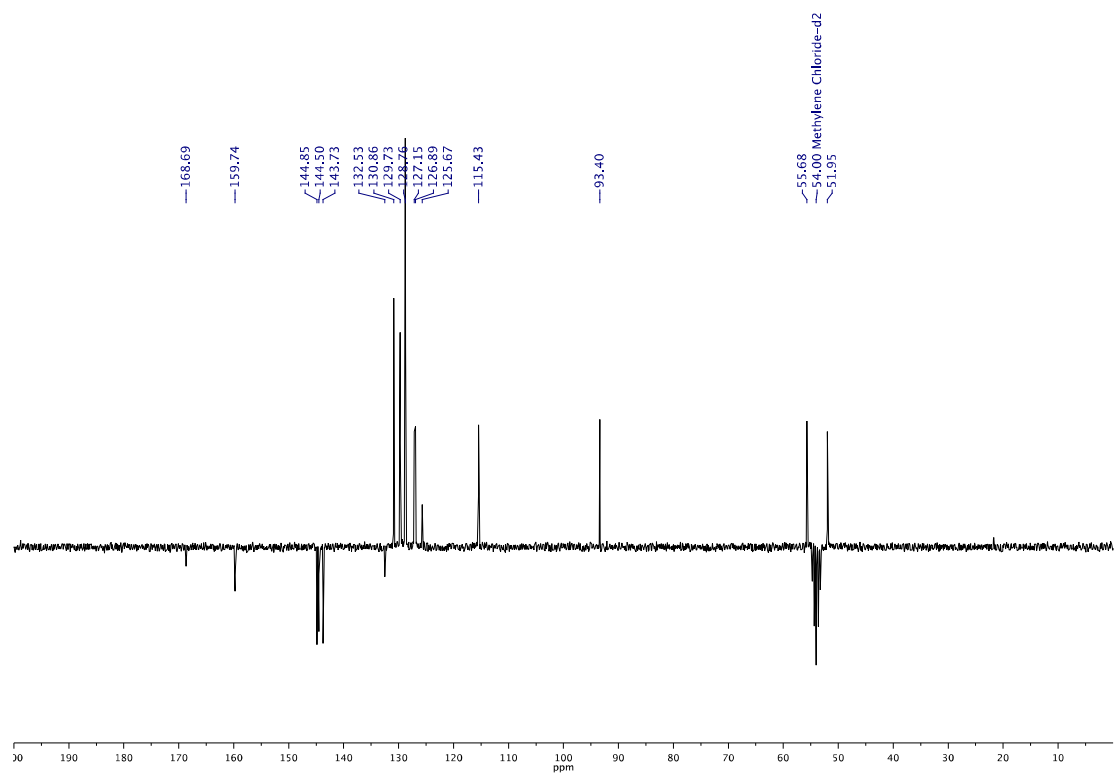

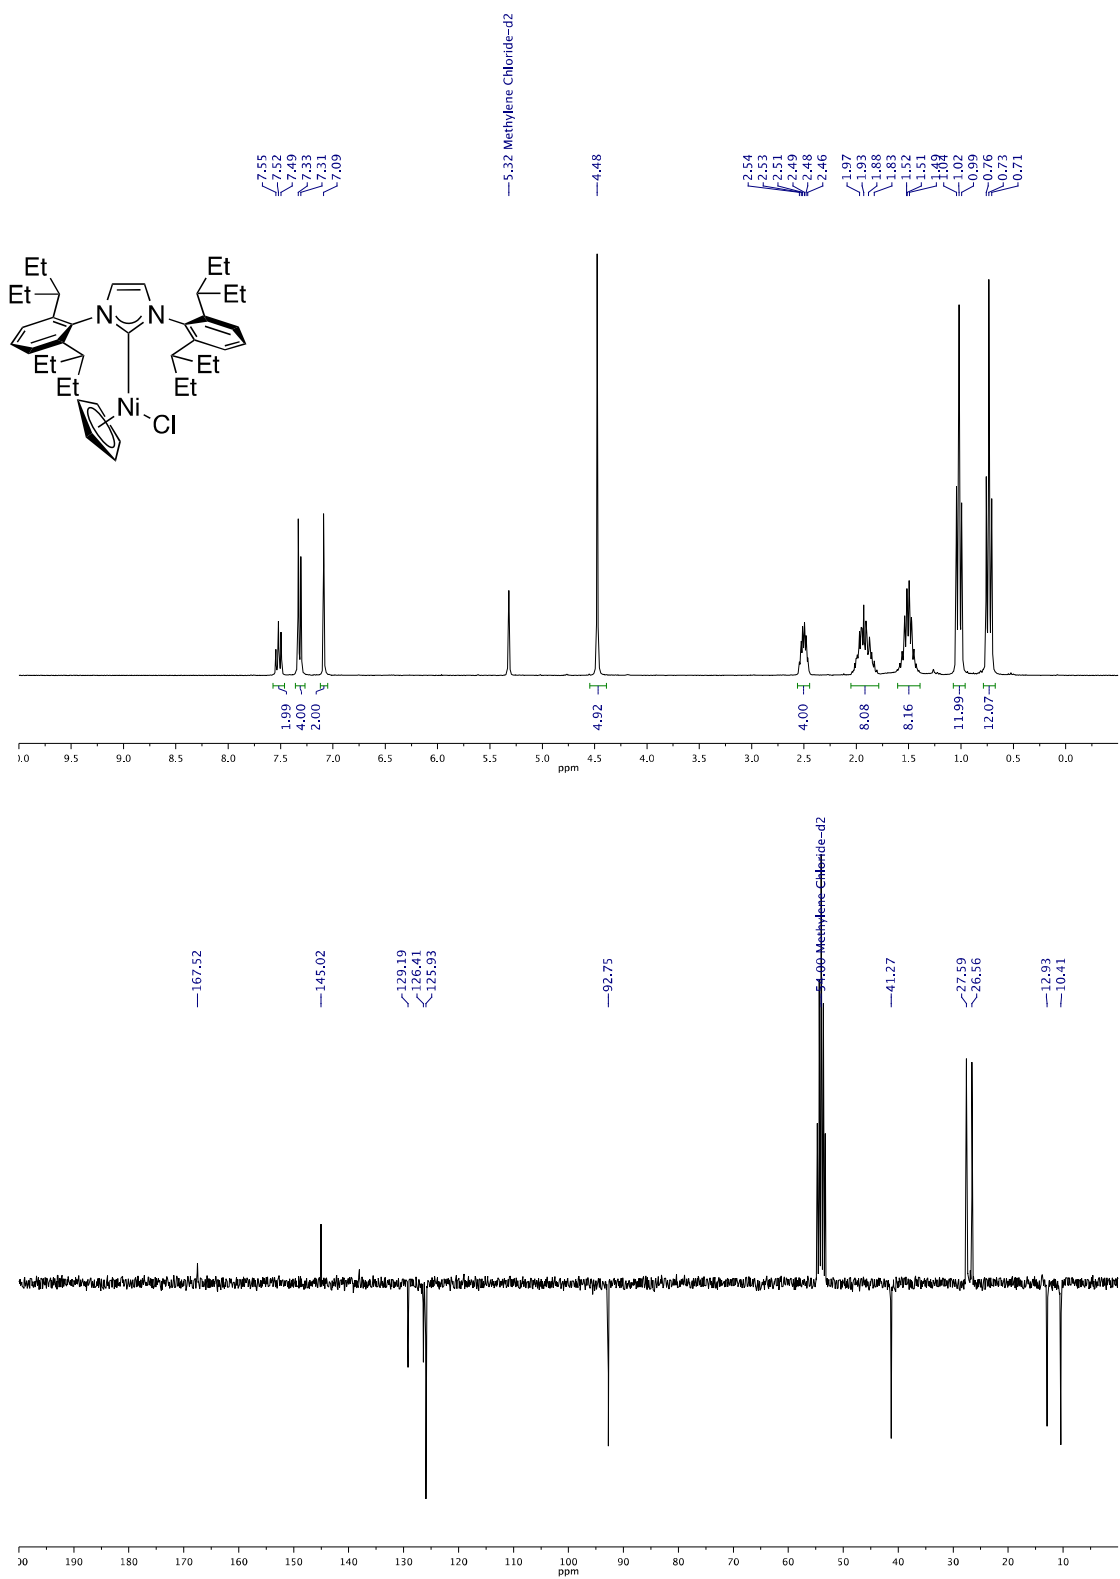

10042012-12-anthonyMI  
AM-2-3  
CDCl<sub>3</sub>

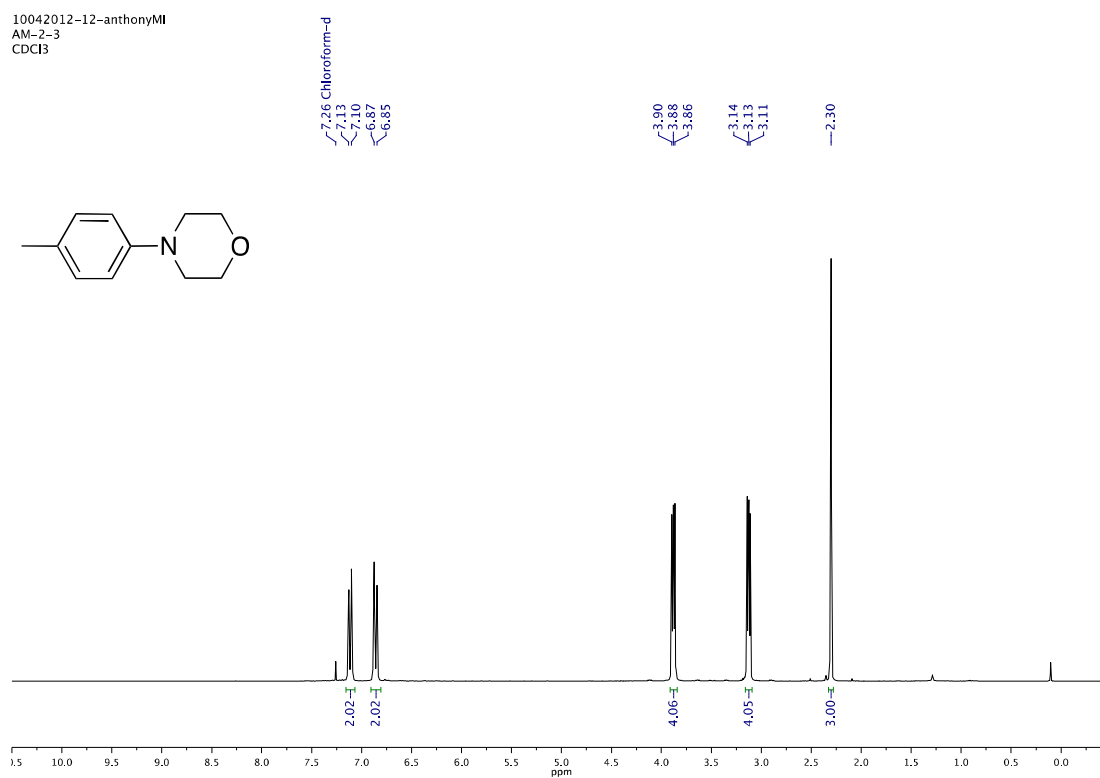

10042012-36-anthonyMI  
AM-2-3  
CDCl<sub>3</sub>

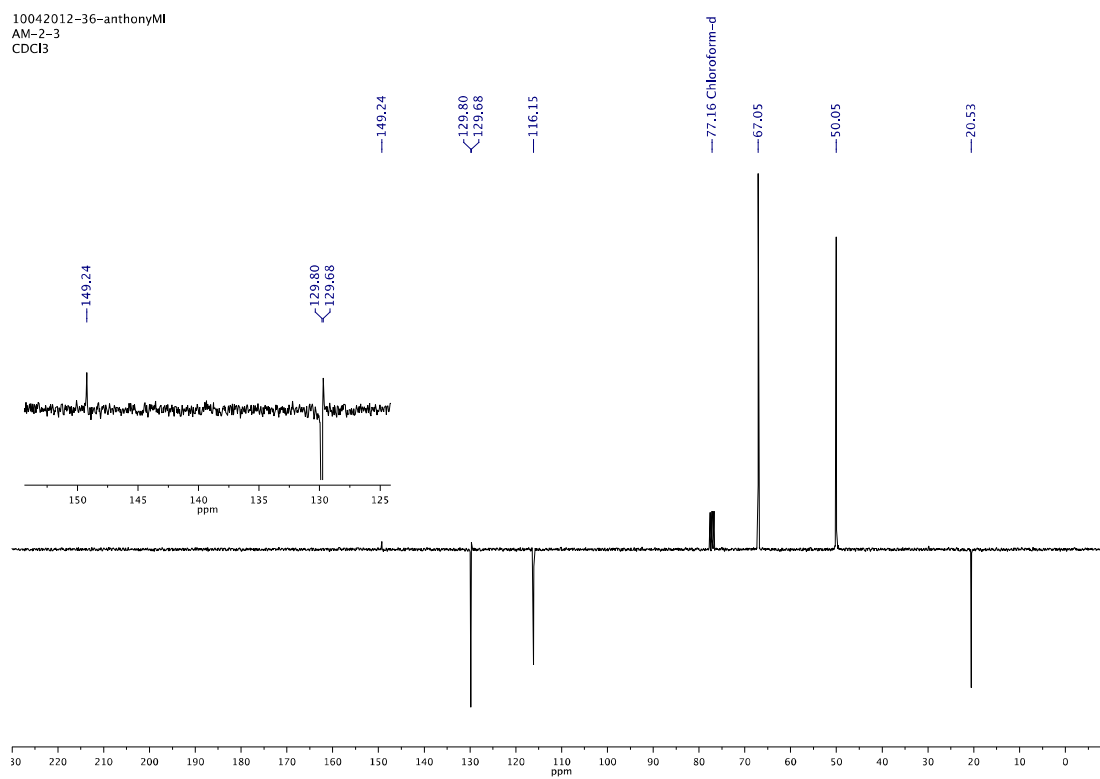

11162012-19-anthonyMI  
AM-2-51  
CDCl<sub>3</sub>

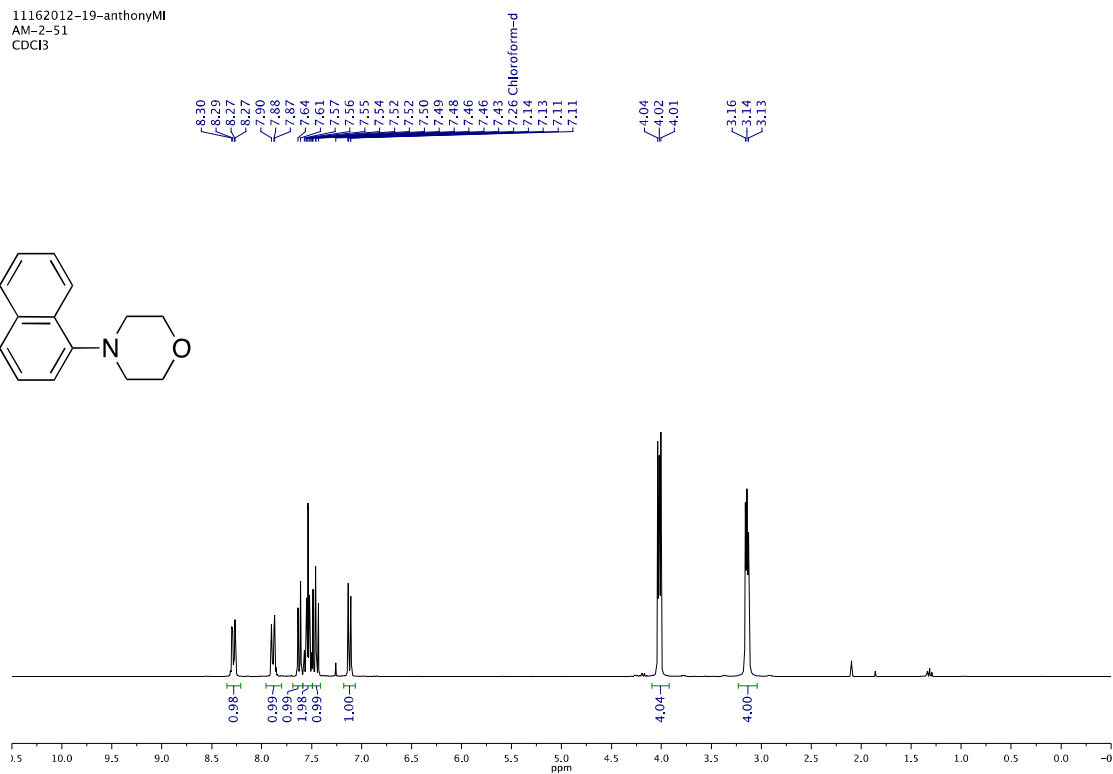

11162012-19-anthonyMI  
AM-2-51  
CDCl<sub>3</sub>

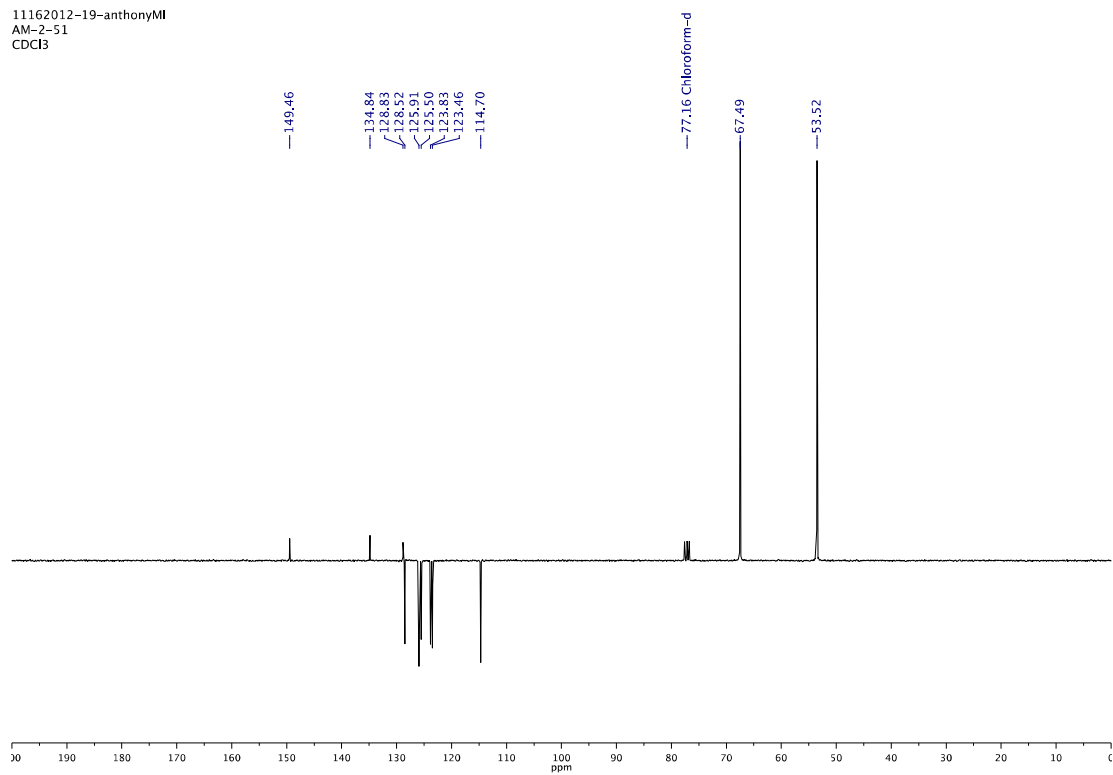



10302012-20-anthonyMR  
AM-2-248  
CDCl<sub>3</sub>

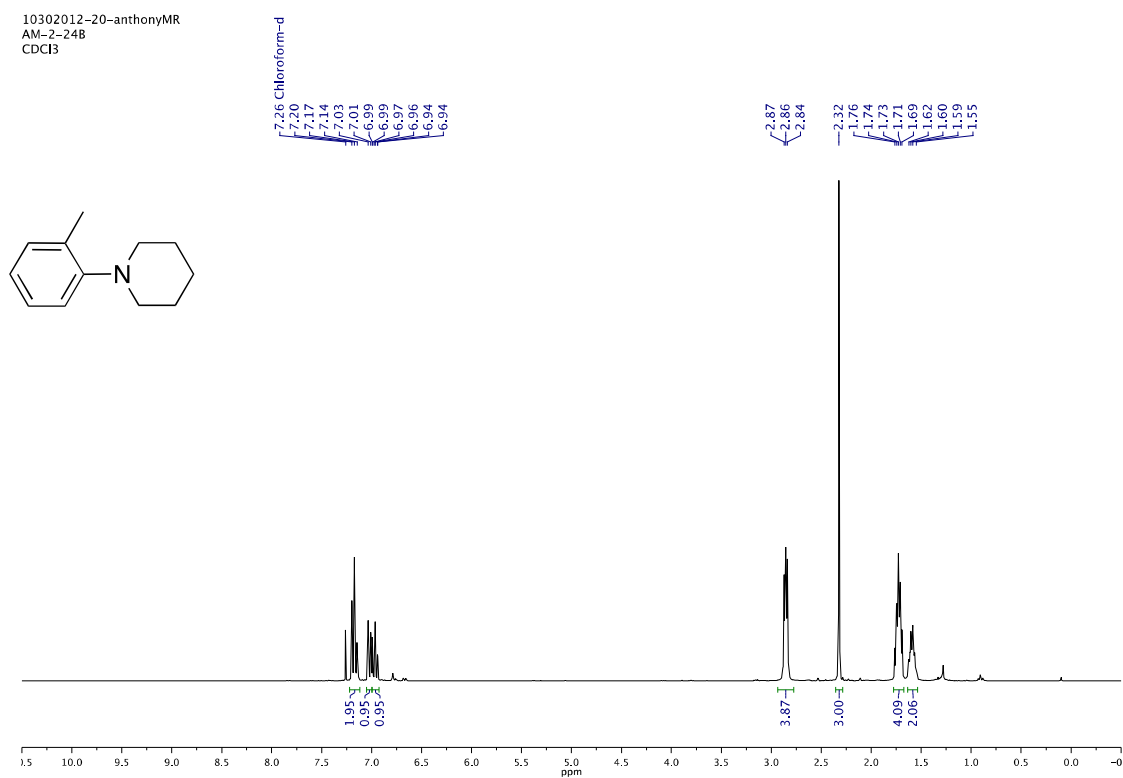

10302012-32-anthonyMI  
AM-2-248  
CDCl<sub>3</sub>

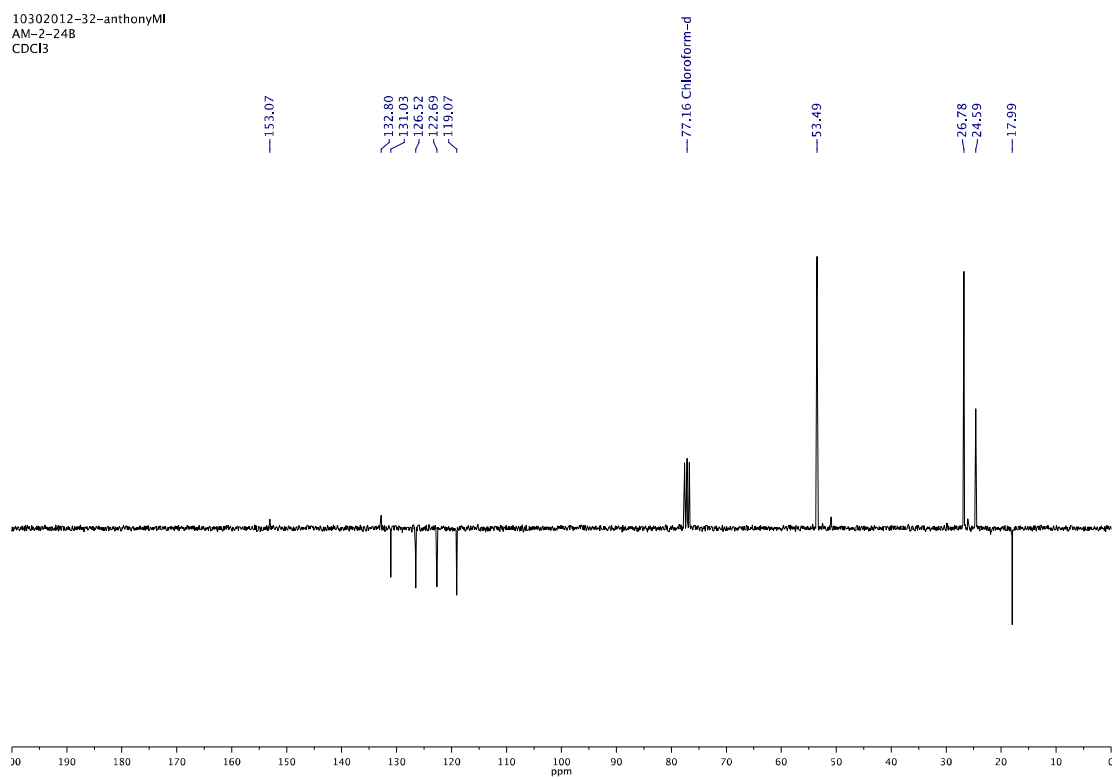

06182013-56-anthonyMM.10.fid  
AM-3-3  
CDCl<sub>3</sub>

7.51  
7.50  
7.26 CDCl<sub>3</sub>  
6.94  
6.92

3.88  
3.87  
3.86  
3.25  
3.24  
3.23

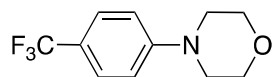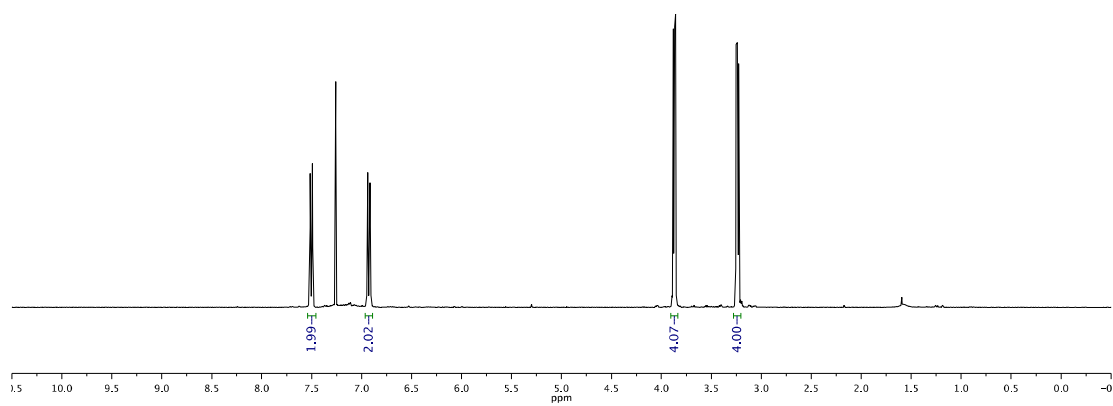

06182013-9-anthonyML10.fid  
AM-3-3  
CDCl<sub>3</sub>

153.47

130.19  
126.68  
126.58  
126.43  
126.48  
123.02  
121.74  
121.31  
120.88  
120.44  
119.43  
114.43

77.16 CDCl<sub>3</sub>

66.76

48.28

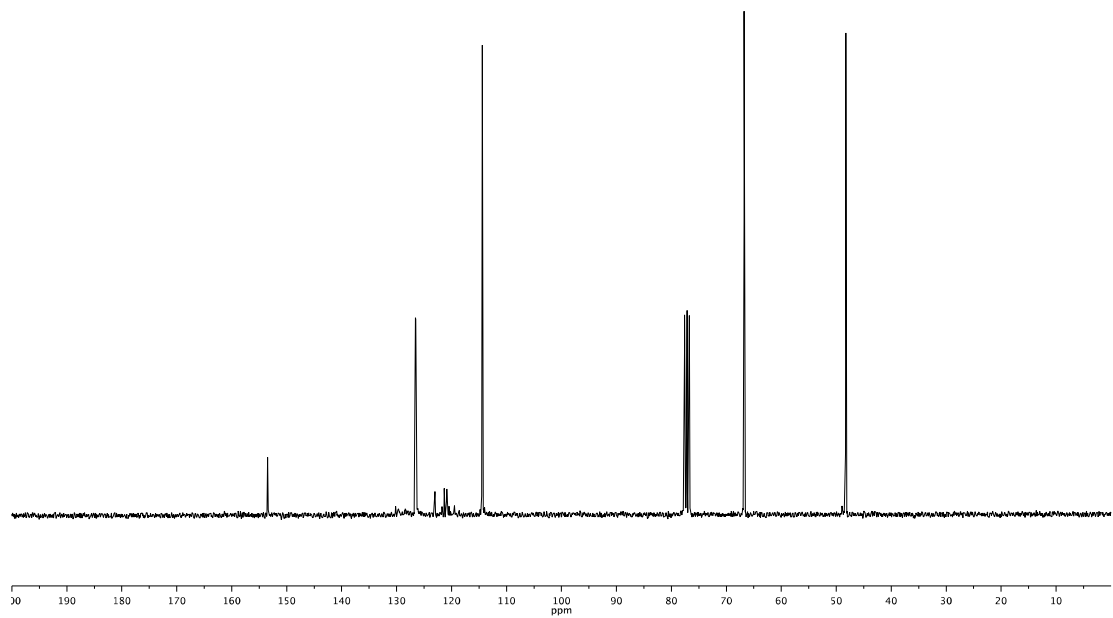

06182013-56-anthonyMM.11.fid  
AM-3-3  
CDCl<sub>3</sub>

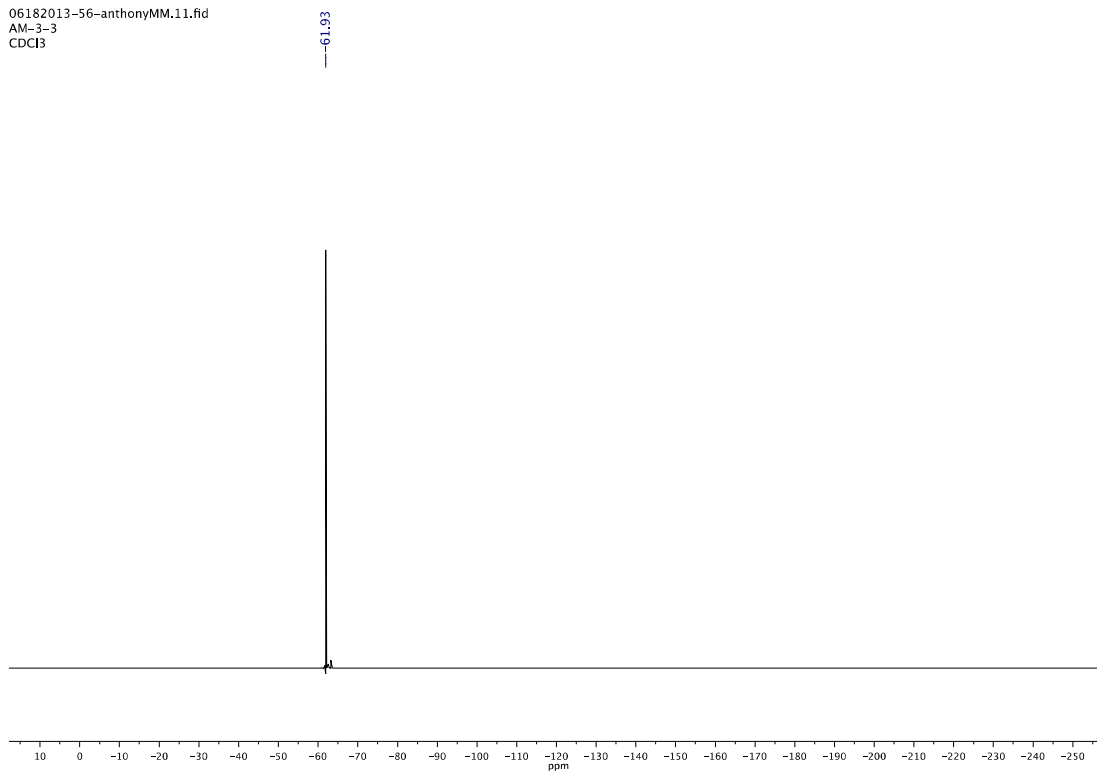

10052012-20-anthonyMR  
AM-2-4  
CDCl<sub>3</sub>

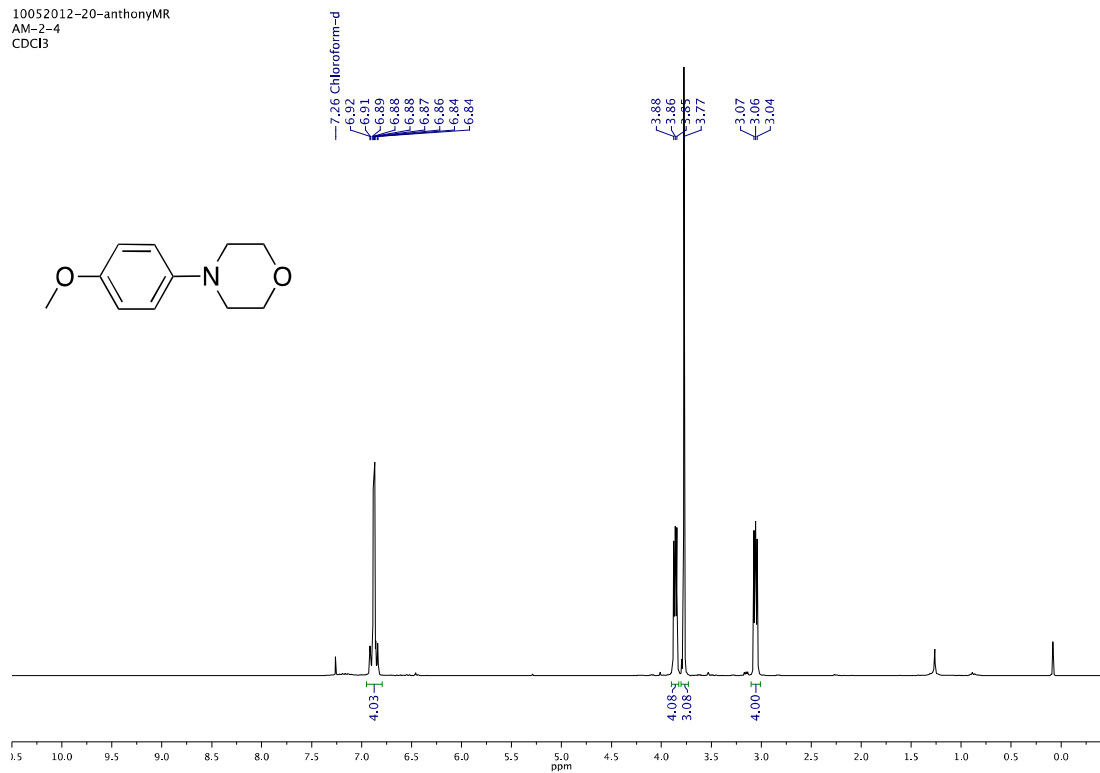

10052012-3-anthonyM1  
AM-2-4  
CDCl<sub>3</sub>

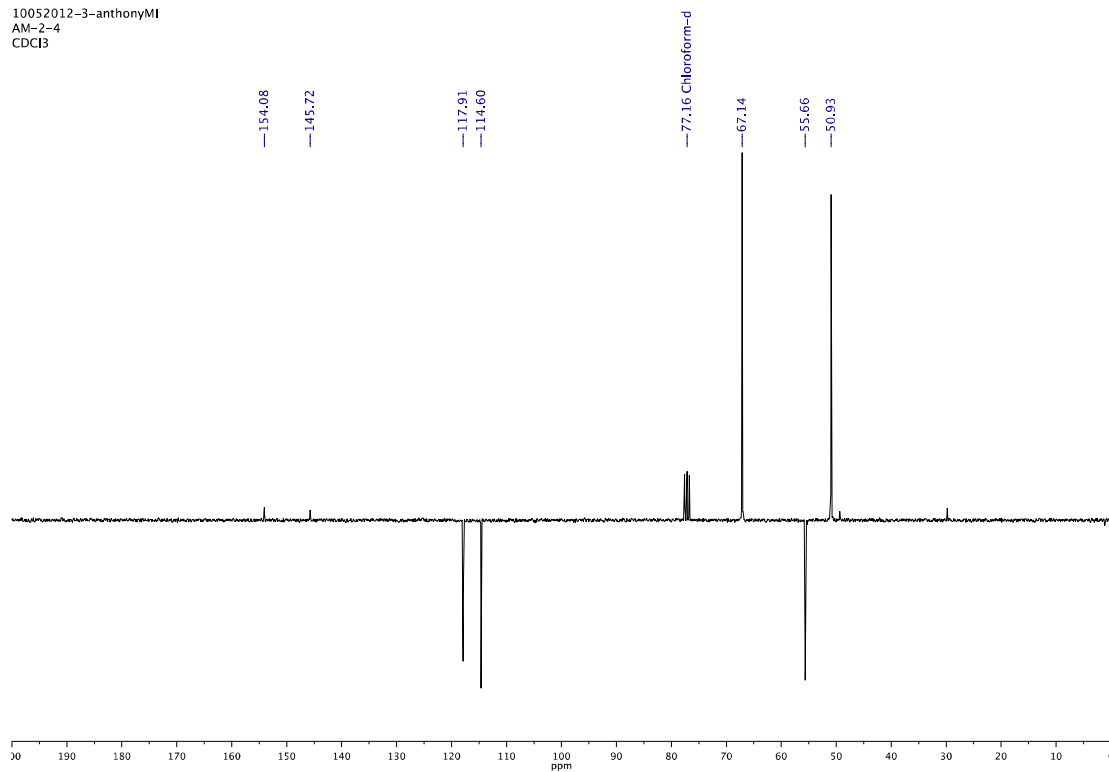

10252012-25-anthonyMM  
AM-2-25  
CDCl<sub>3</sub>

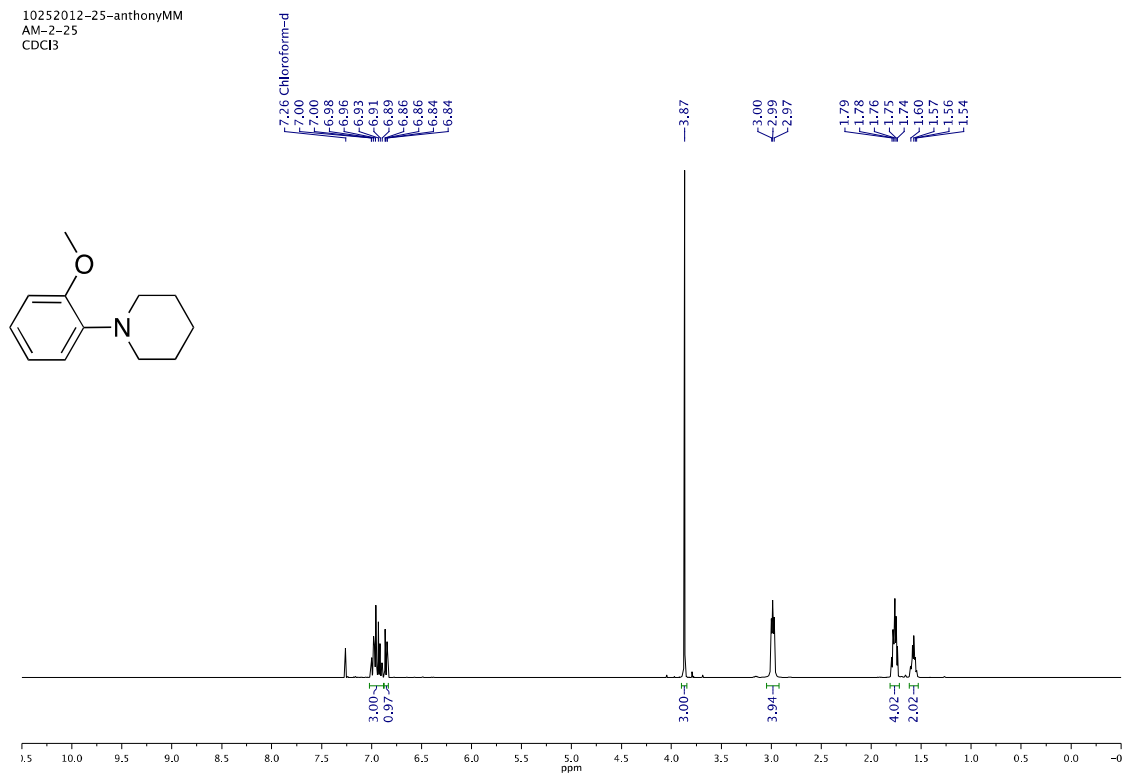

10252012-4-anthonyMI  
AM-2-25  
CDCl<sub>3</sub>

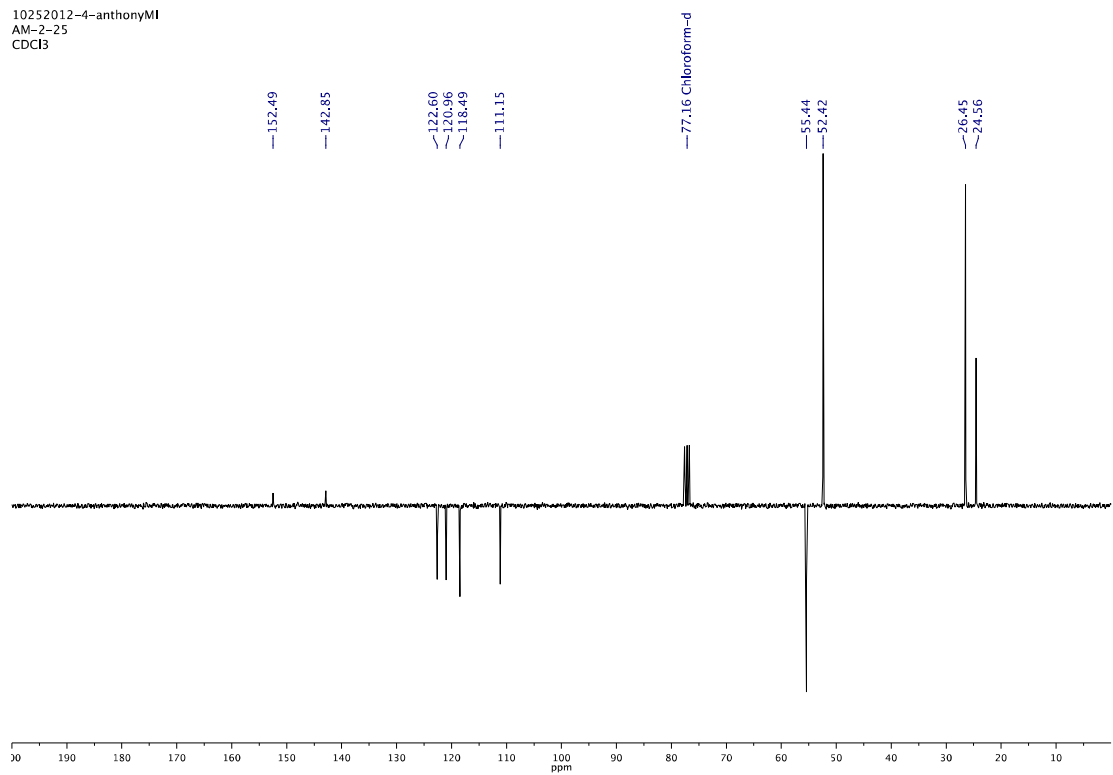

10172012-20-anthonyMI  
AM-2-17  
CDCl<sub>3</sub>

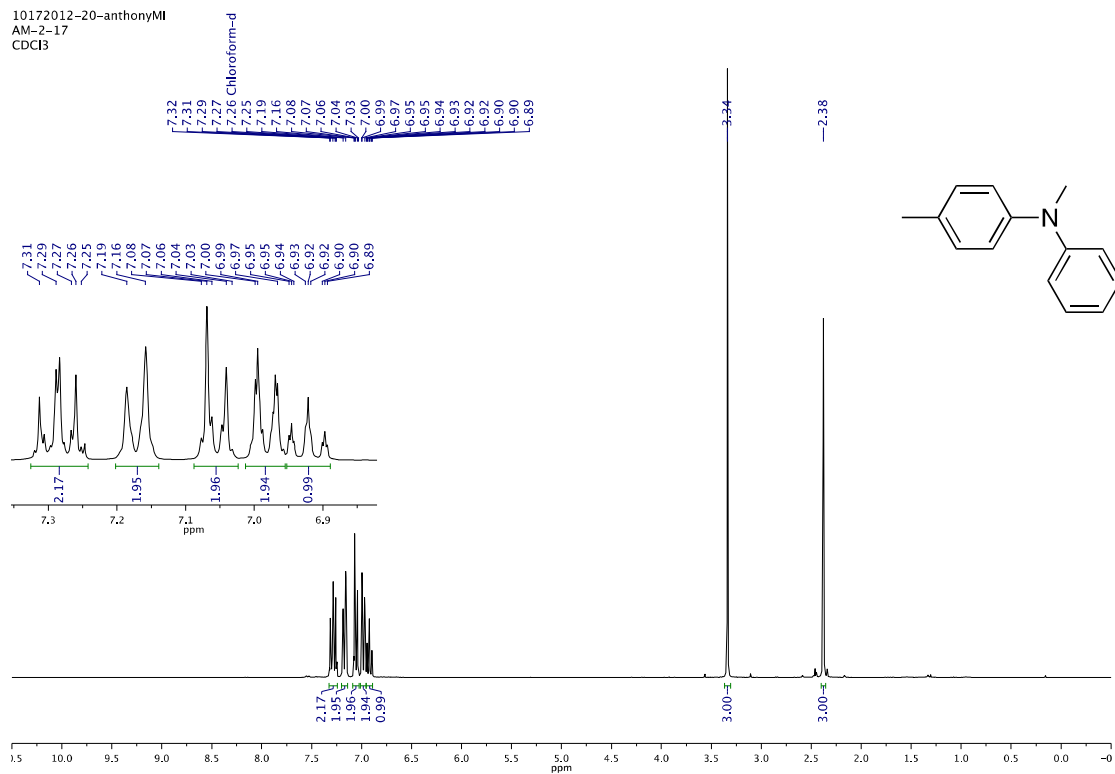

10172012-20-anthonyMI  
AM-2-17  
CDCl<sub>3</sub>

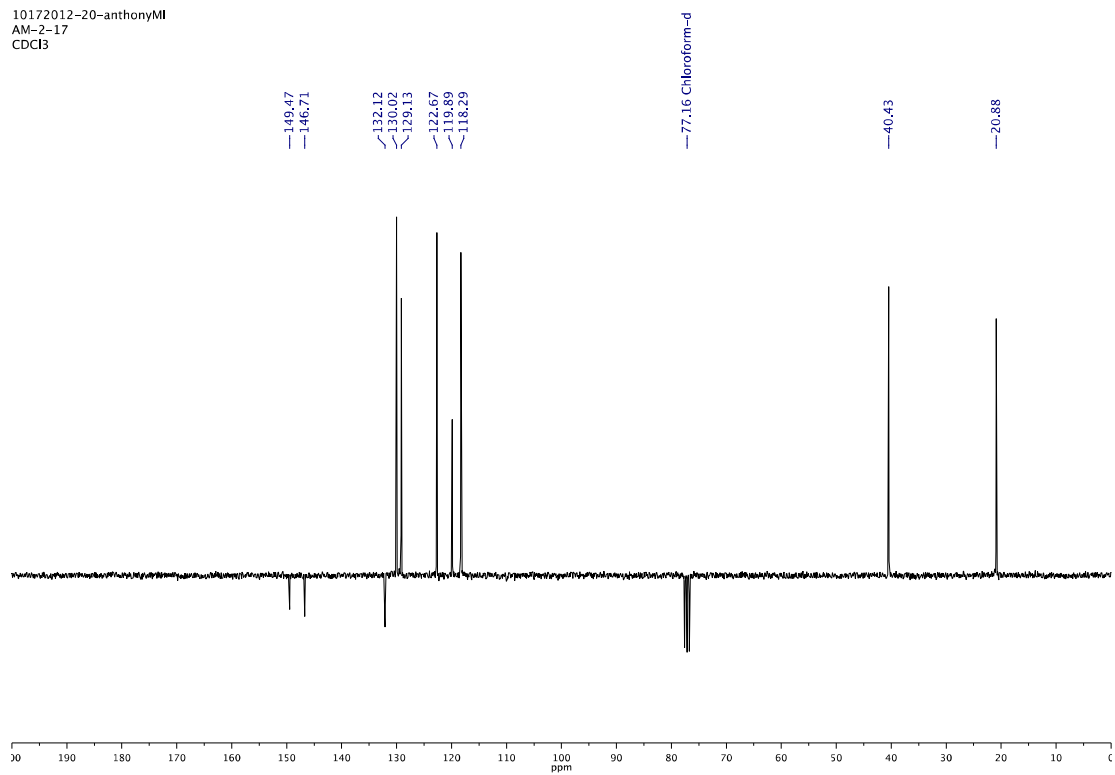

10192012-12-anthonyMI  
AM-2-18  
CDCl<sub>3</sub>

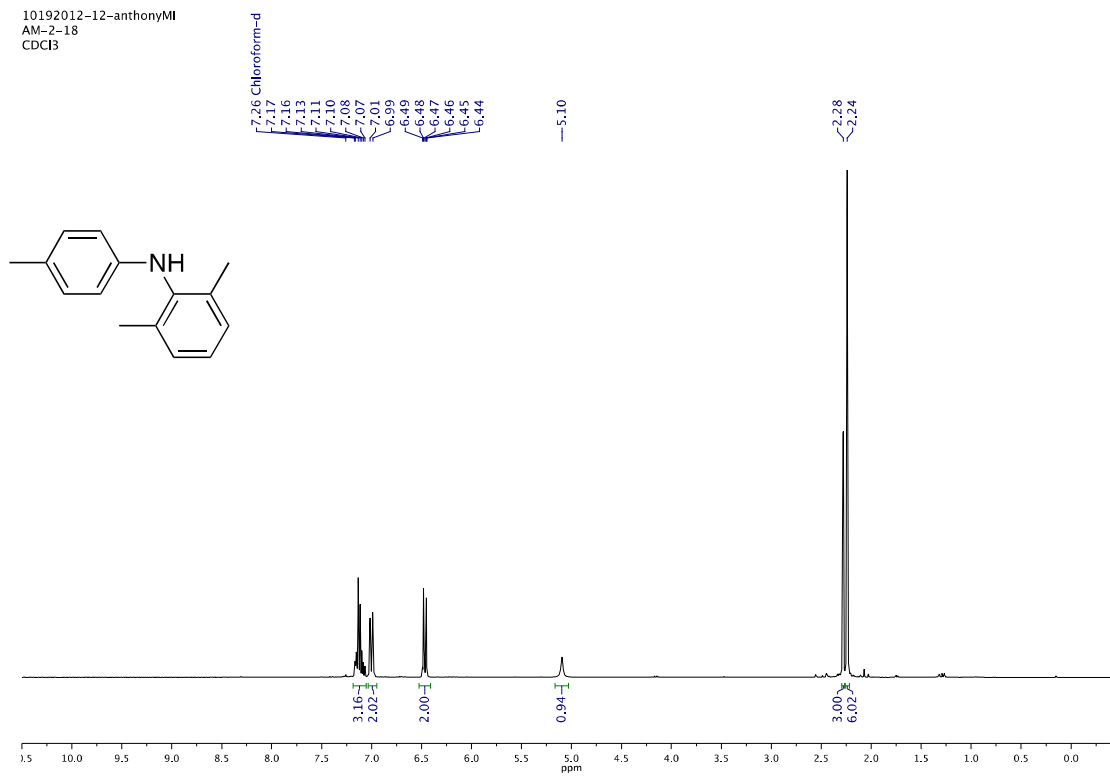

10192012-2-anthonyMI  
AM-2-18  
CDCl<sub>3</sub>

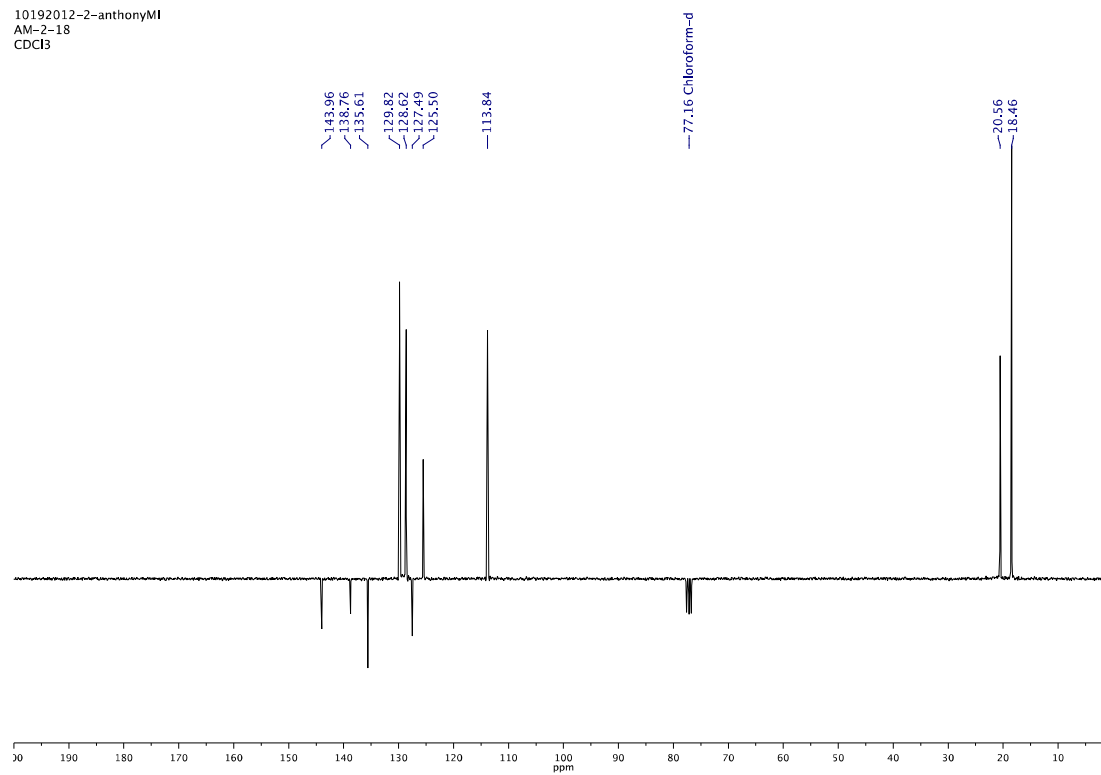

10202012-12-anthonyMI  
AM-2-23  
CDCl<sub>3</sub>

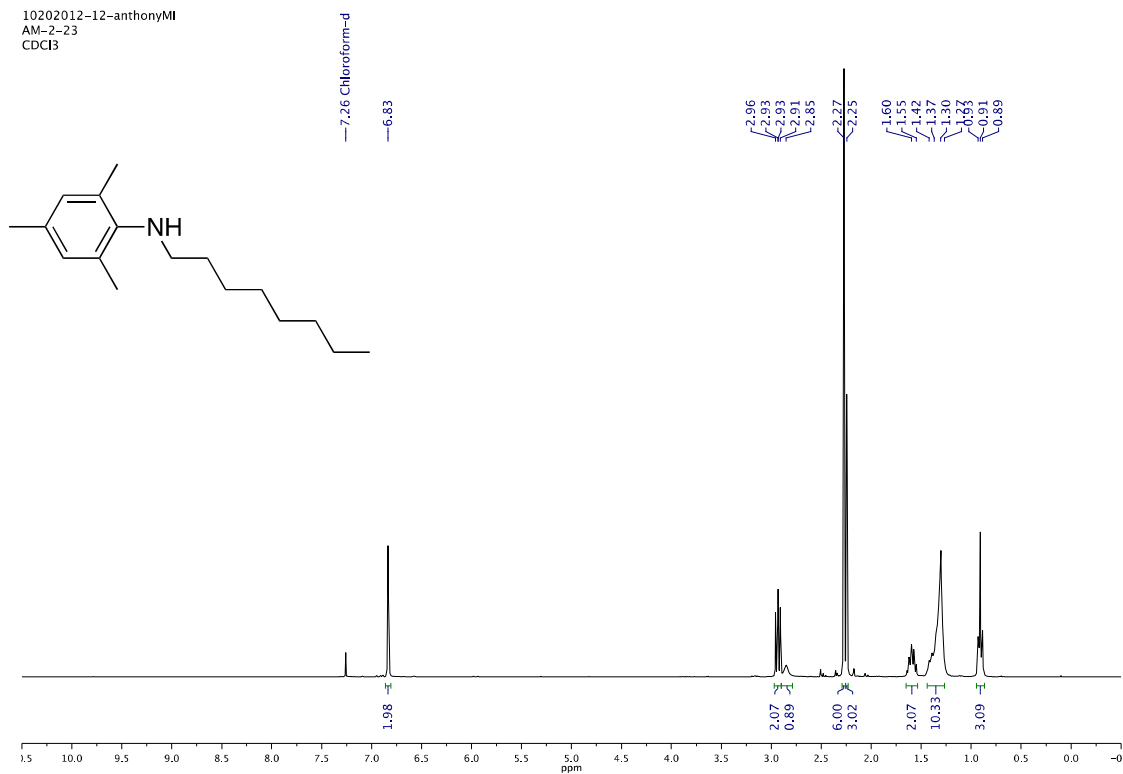

10202012-13-anthonyMI  
AM-2-23  
CDCl<sub>3</sub>

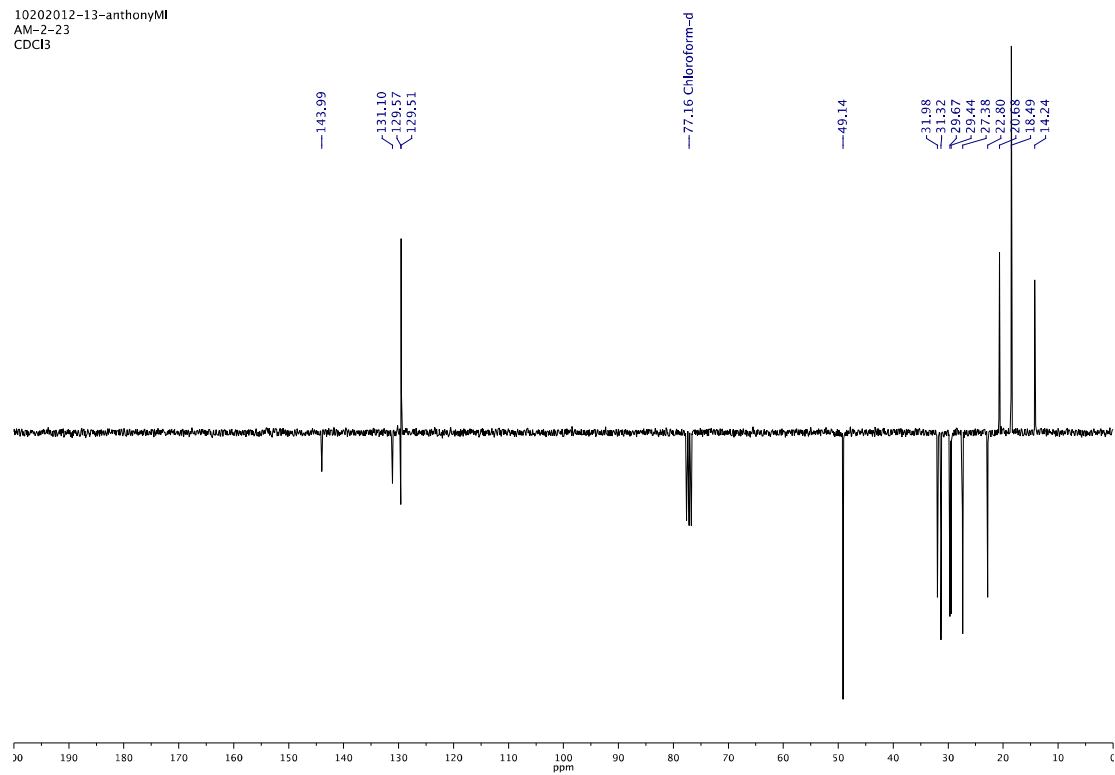



10252012-1-anthonyMR  
AM-2-26  
CDCl<sub>3</sub>

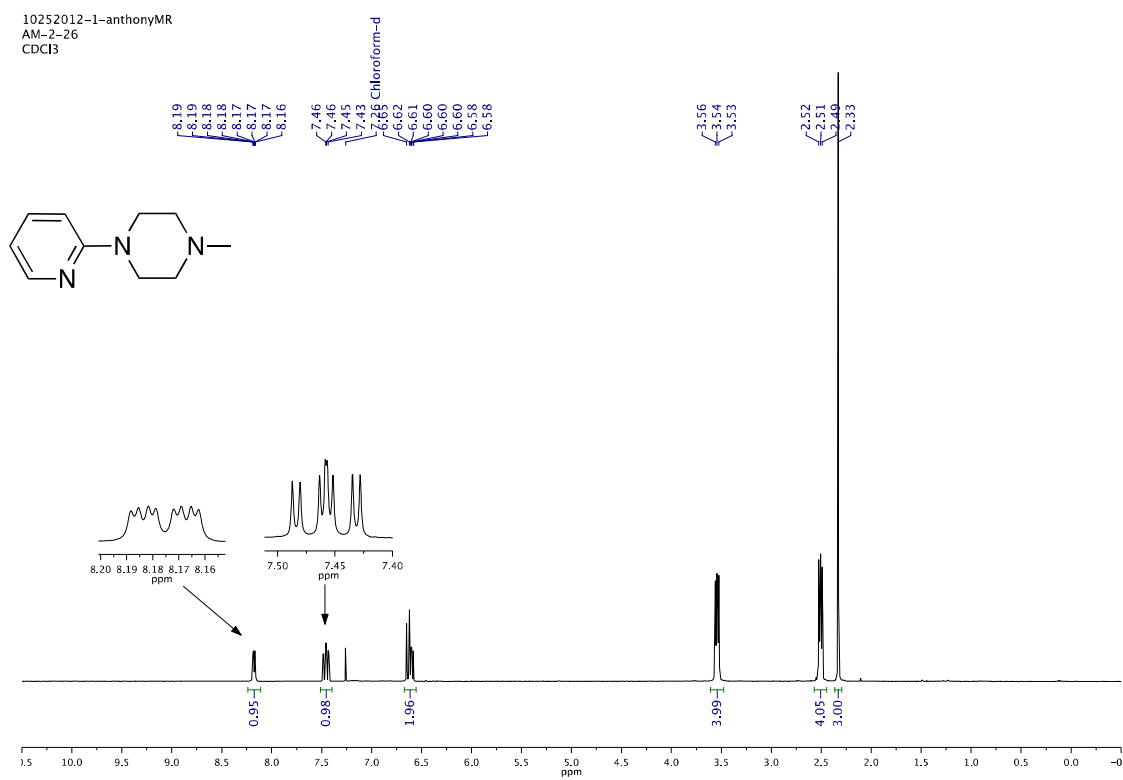

10252012-5-anthonyMI  
AM-2-26  
CDCl<sub>3</sub>

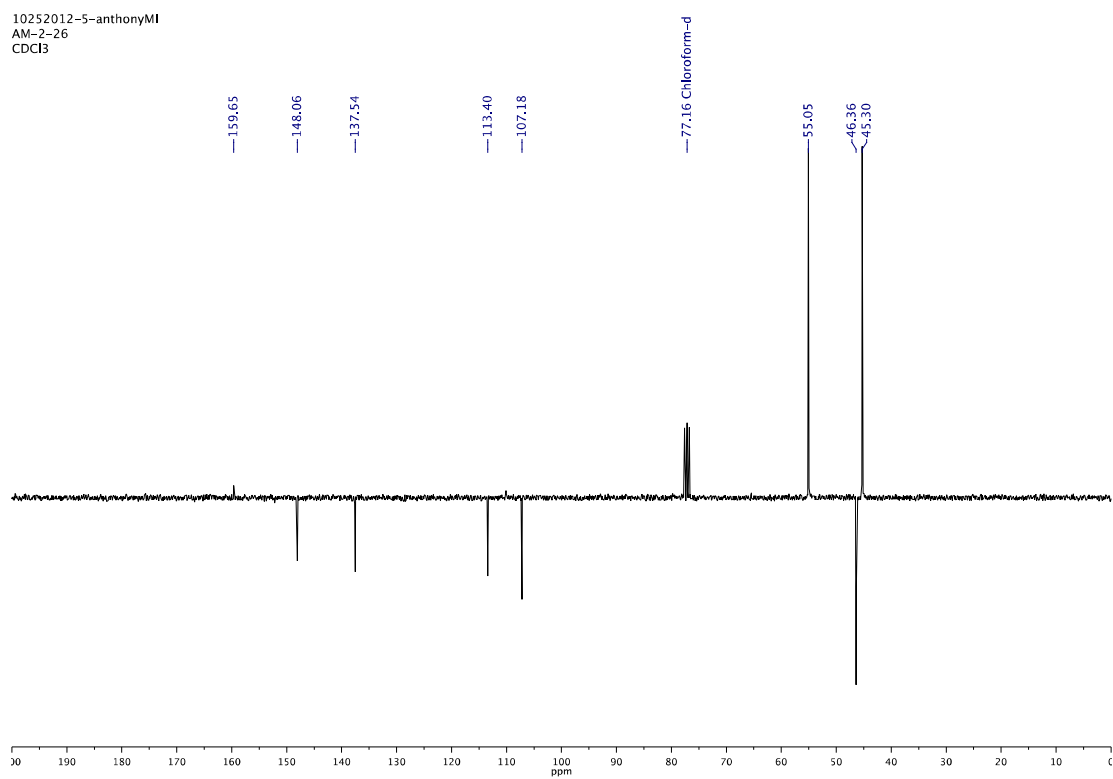

10242012-23-anthonyMI  
AM-2-27  
CDCl<sub>3</sub>

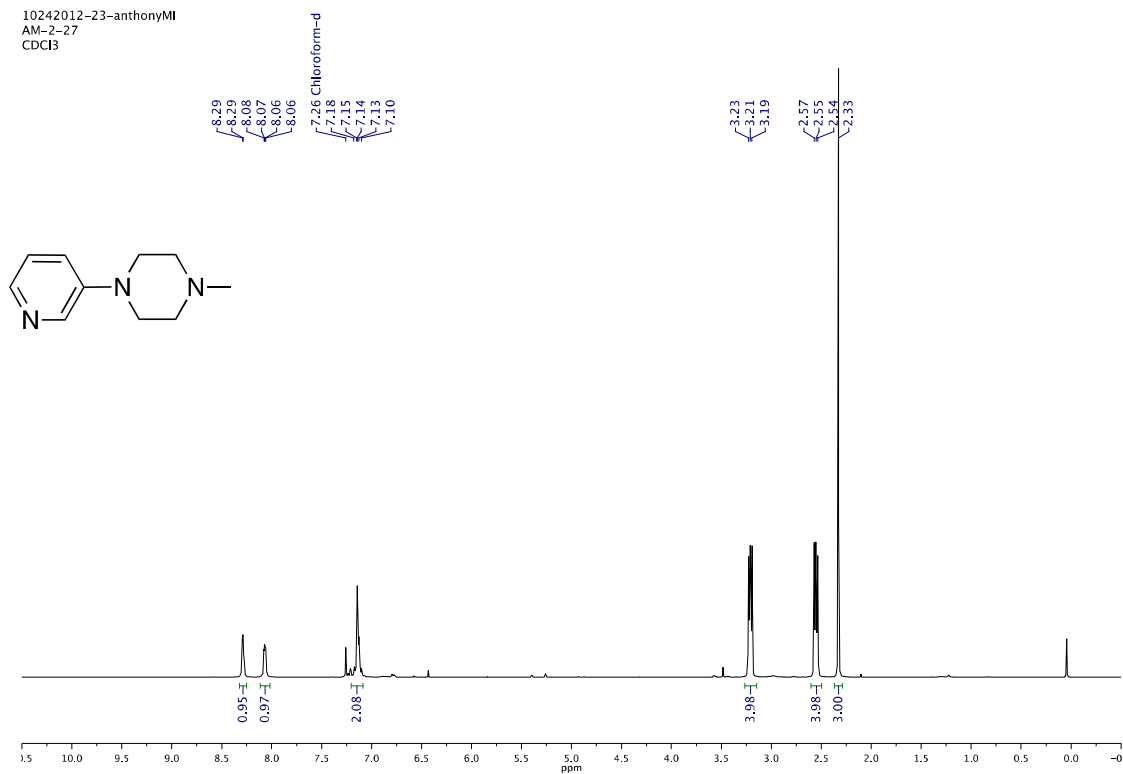

10242012-30-anthonyMI  
AM-2-27  
CDCl<sub>3</sub>

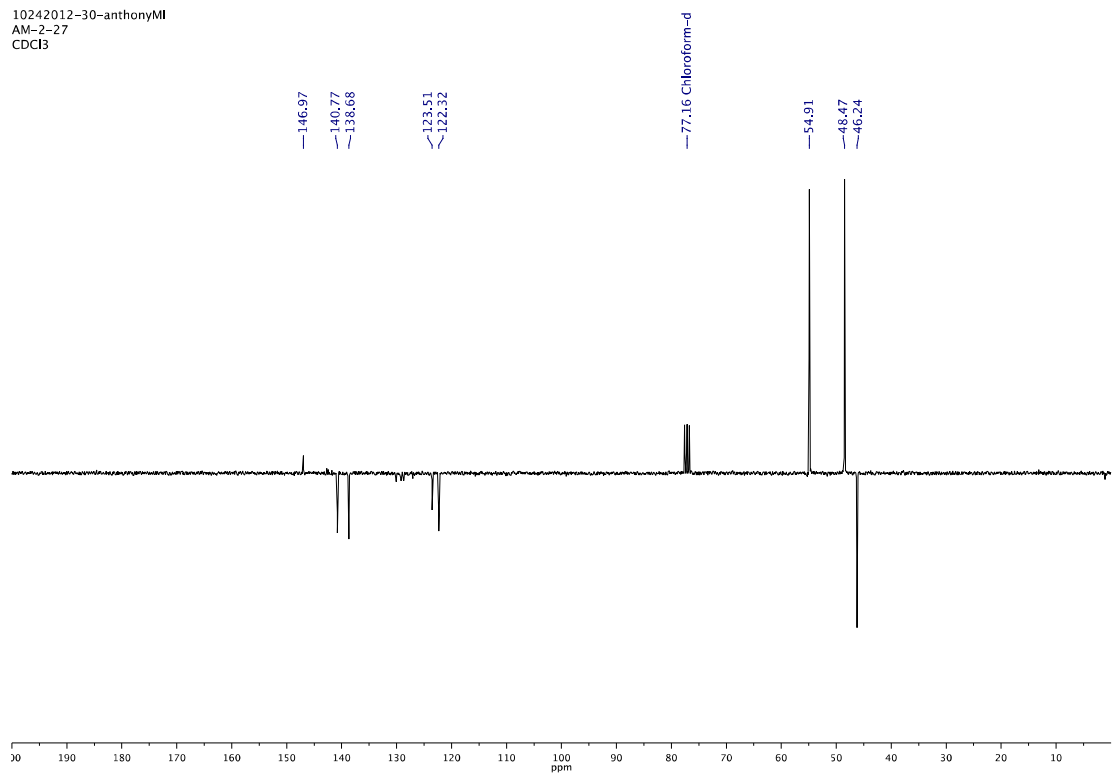

Supplement: Supplementary file 1 [file 3994009]
